# Supplementary material
Source: PubMed Central journal article supplement (PMC5409503)
Supplement: NIHMS71696-supplement-Supplementary_Figures.pdf [file NIHMS71696-supplement-Supplementary_Figures.pdf]

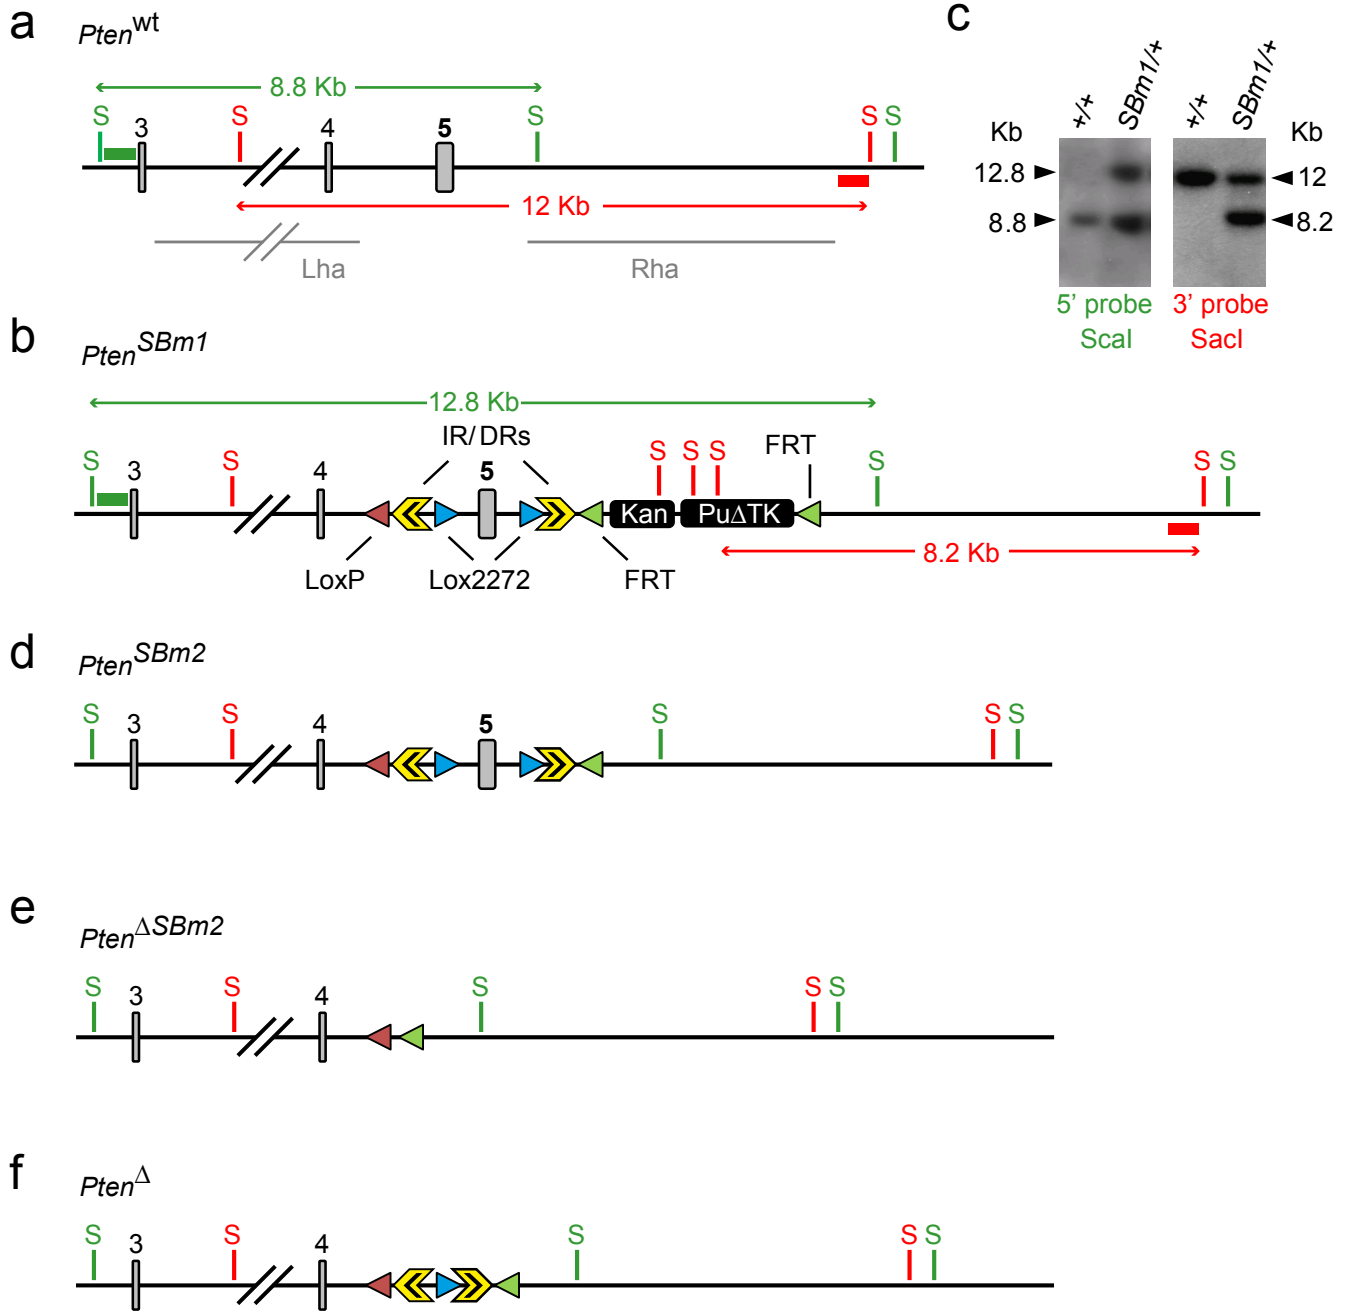

**Supplementary Figure 1.** Schematic representation of the generation of the *Sleeping Beauty*-dependent inactivatable *Pten* allele. **(a)** Wild-type mouse *Pten* locus ( $Pten^{wt}$ ). Grey boxes: exons; Lha/Rha: left and right homology arms; green rectangle: 5' probe; red rectangle: 3' probe. **(b)** Targeted *Pten* allele before removal of resistance cassette ( $Pten^{SBm1}$ ). *Pten* exon 5 was flanked by two 5'-inverted terminal repeats of SB. Restriction sites relevant for the Southern-blot based screening are represented. Kan: kanamycin resistance cassette; Pu $\Delta$ TK: puromycin resistance cassette. **(c)** Southern-blot analysis of successfully targeted  $Pten^{SBm1}$  clones. 5' (left) and 3' (right) screenings are shown. **(d)** Targeted *Pten* allele after removal of resistance cassette ( $Pten^{SBm2}$ ). When F1 males heterozygous for the  $Pten^{SBm1}$  allele are mated with *Rosa26*<sup>FlpE/FlpE</sup> to remove the FRT-flanked Pu $\Delta$ TK, offspring with the  $Pten^{SBm2}$  conditional allele is generated. **(e)** Targeted *Pten* allele after transposon mobilization ( $Pten^{\Delta SBm2}$ ). Mice with the  $Pten^{SBm2}$  allele can be crossed to mice carrying the SB transposase to allow mobilization of the *Pten* exon 5 transposon, thus generating a *Pten* null allele ( $Pten^{\Delta SBm2}$ ) and an additional mutation elsewhere in the genome if reintegration of the transposon occurs. **(f)** Targeted *Pten* allele after Cre mediated recombination ( $Pten^{\Delta}$ ). The  $Pten^{SBm2}$  allele can be used as Cre-conditional *Pten* allele, based on the presence of two Lox2272 sites flanking the essential *Pten* exon 5.

a

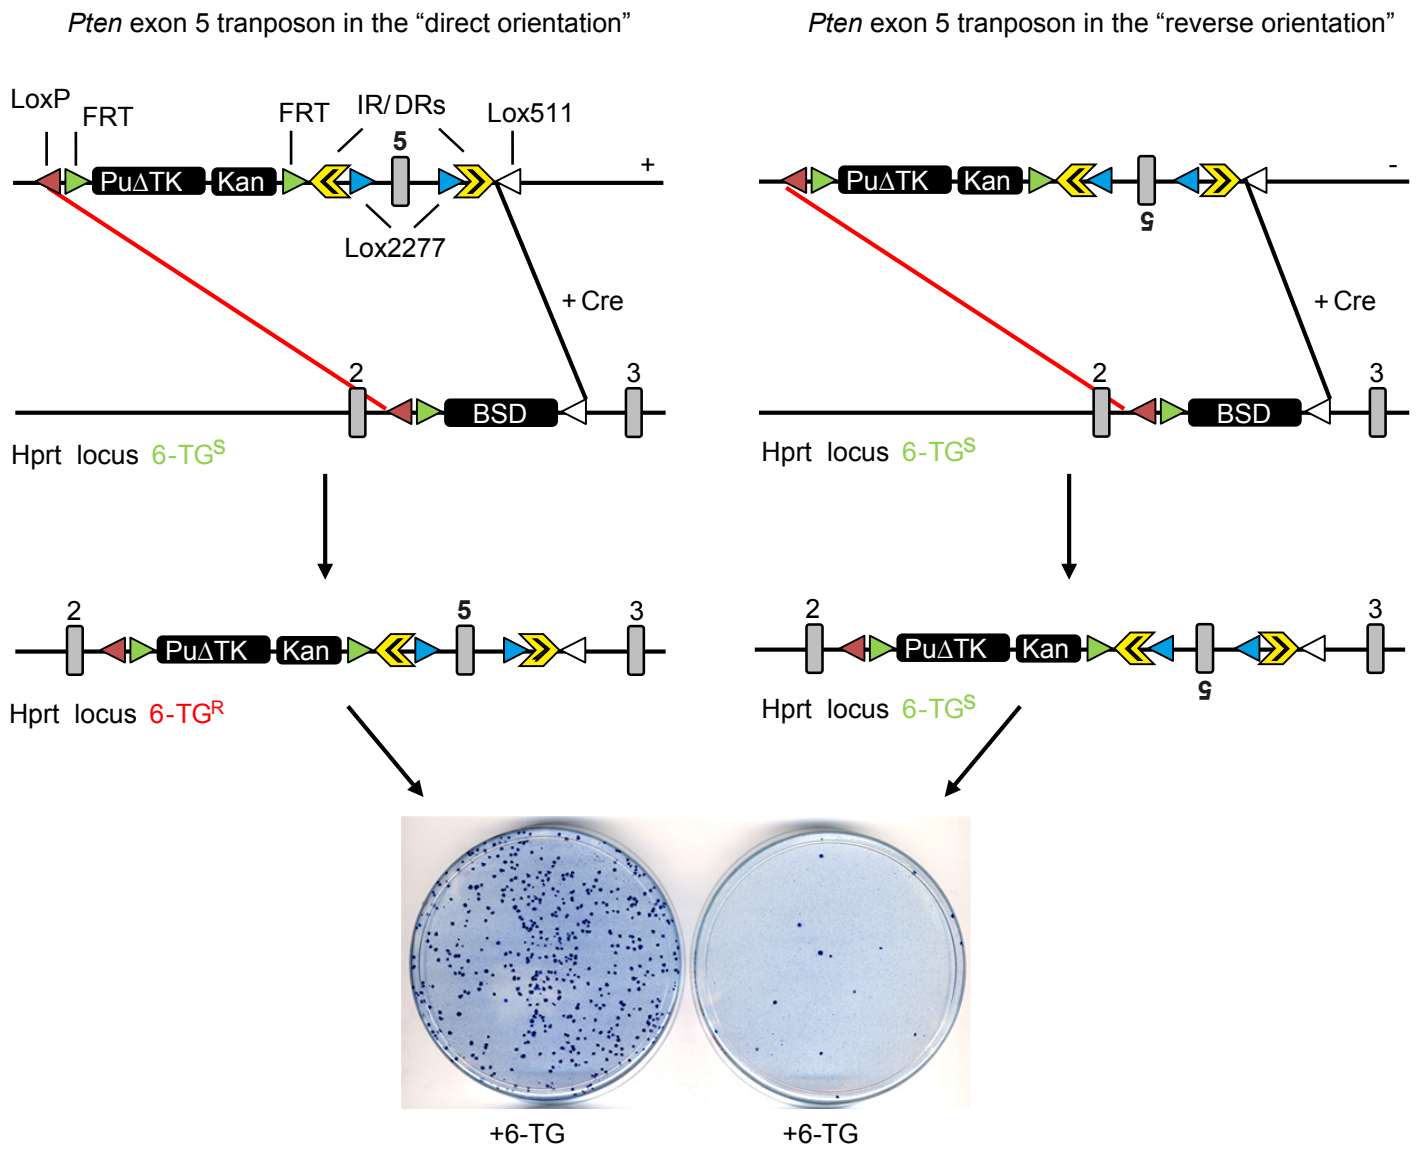

b

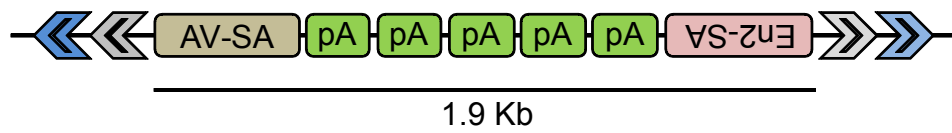

**Supplementary Figure 2.** Inactivating capacity of the *Pten* exon 5 transposon and genetic structure of the ITP2m transposable element. **(a)** To ascertain the inactivating ability of the SB transposon harboring *Pten* exon 5 and surrounding intronic sequences as its only cargo, we performed an *Hprt* trapping assay. Two constructs with the *Pten* exon 5 transposon in the direct (left side of the figure) or reverse (right side of the figure) orientations were targeted into the X-linked *Hprt* locus in male ES cells. Then, cells were grown in the presence of 6-Thioguanine (6-TG), allowing for selection of *Hprt*-deficient cells. 6-TG resistant colonies are shown at the bottom of the figure. The transposon showed inactivating ability in the direct orientation (left plate) but nearly no trapping activity in the reverse orientation (right plate). **(b)** Structure of the ITP2m transposon. The ITP2m transposon is composed of one Adenovirus (AV-SA) and one Engrailed 2 (En2-SA) splice acceptors flanking five bi-directional polyadenylation signals. This cassette is flanked by *PiggyBac* (blue arrows) and *Sleeping Beauty* (grey arrows) terminal repeats, allowing transposon mobilization by both transposases. In total, the cargo size of the transposon is 1.9 Kb. ITP2m mouse lines carry around 35 copies of this inactivating transposon in chromosome 14.

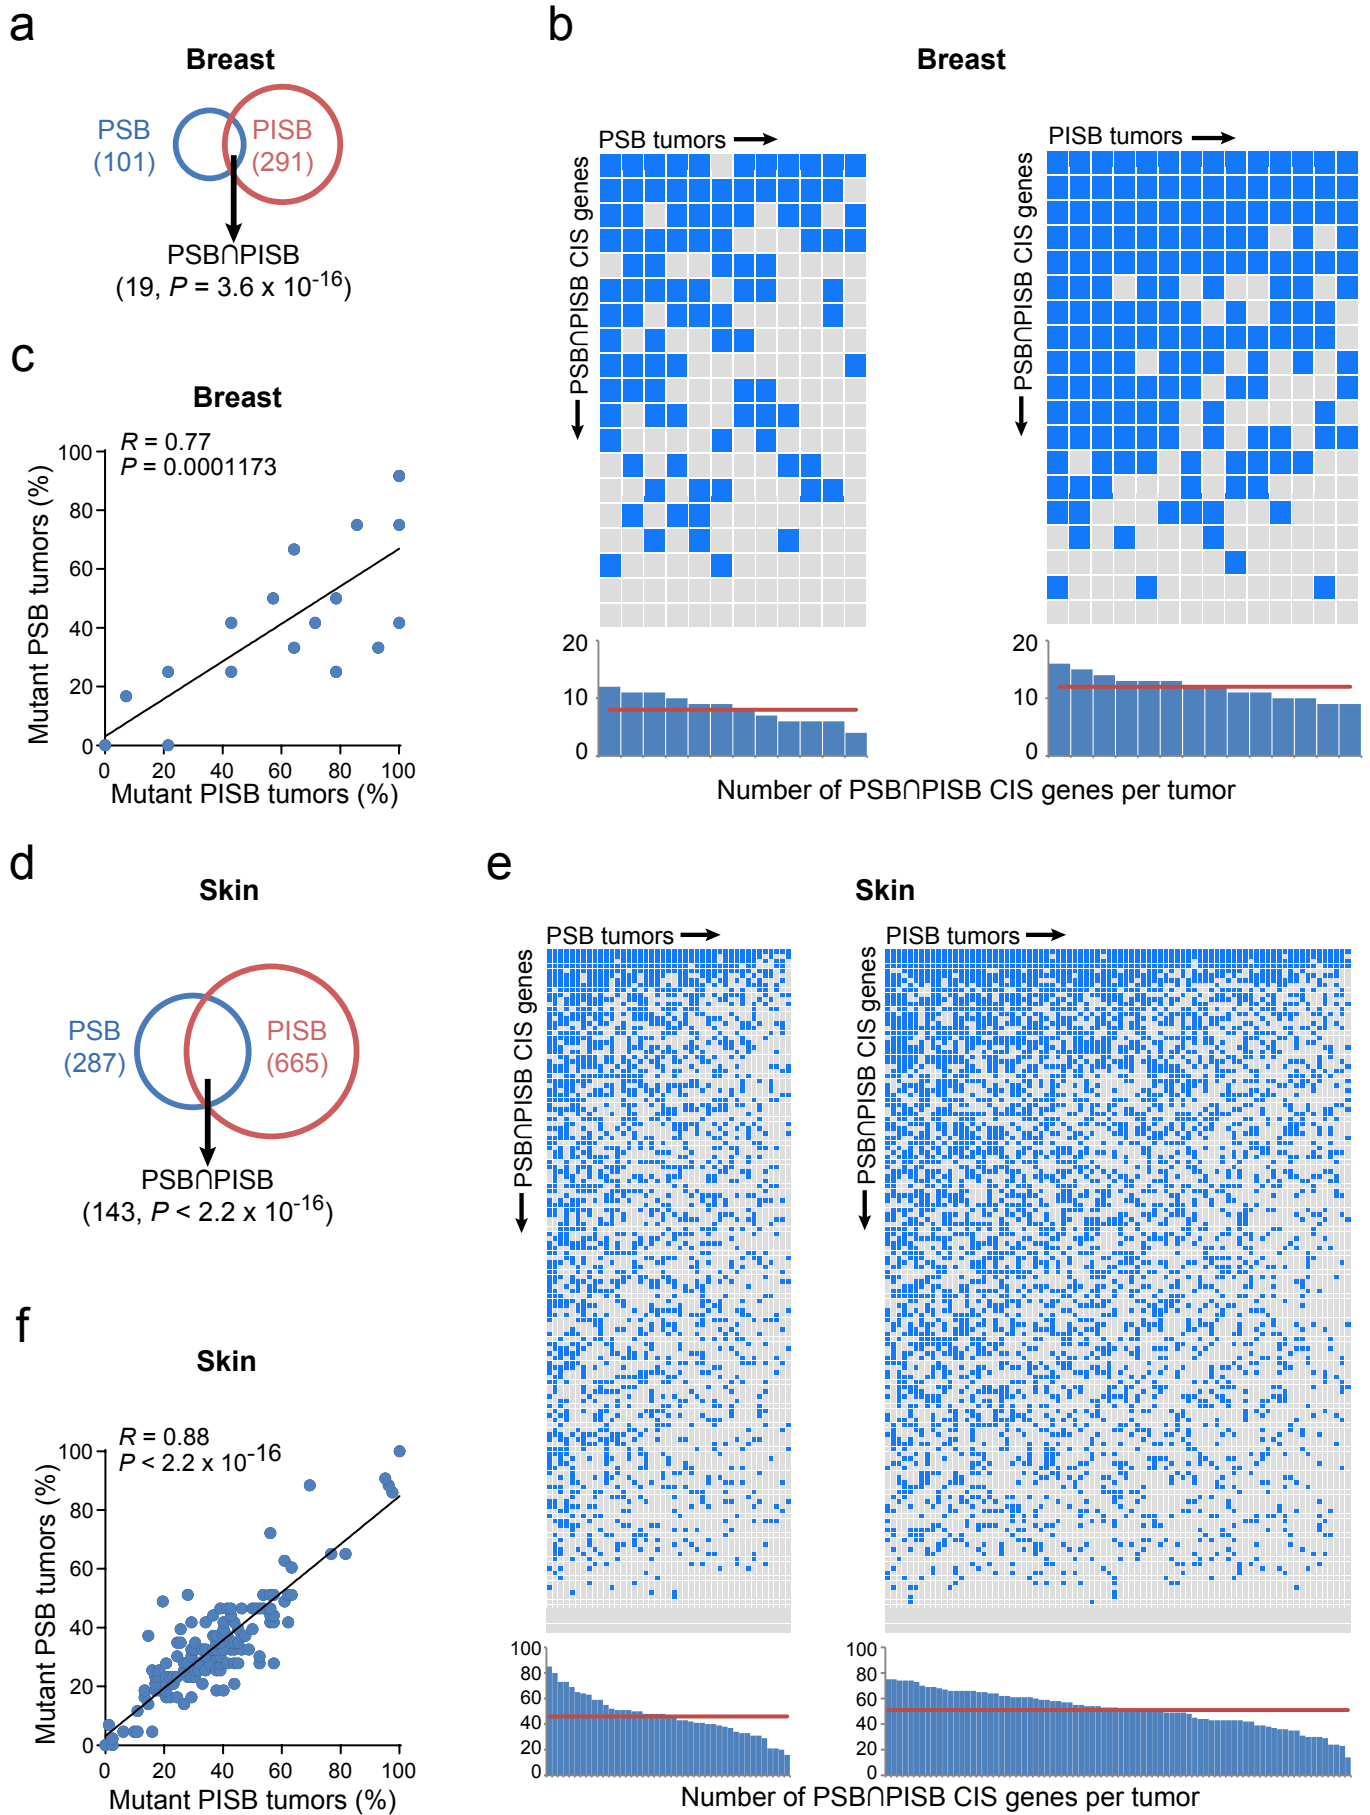

**Supplementary Figure 3.** Analysis of  $PSB \cap PISB$  CIS genes identified in breast and skin tumors. **(a)** Overlap between PSB (n=101) and PISB (n=291) CIS genes identified in breast tumors. *P* value was calculated using a two-by-two contingency table and Fisher's exact test. **(b)** Distribution of overlapping breast CIS genes (n=19) between PSB and PISB screens (referred to as  $PSB \cap PISB$  CIS genes) across the 26 breast tumors analyzed. In each tumor,  $PSB \cap PISB$  CIS genes containing SB insertions are depicted as blue boxes. The histograms show the total number of  $PSB \cap PISB$  CIS genes with insertions per each tumor. Red horizontal lines represent the median of  $PSB \cap PISB$  CIS genes with insertions per PSB (left) and PISB (right) tumors, respectively. **(c)** Scattered plot showing the correlation between the frequency of PSB and PISB breast tumors with insertions in each single  $PSB \cap PISB$  CIS gene (n=19). *R*, Pearson correlation coefficient. *P* value was calculated by Pearson's correlation test. **(d)** Overlap between PSB (n=287) and PISB (n=665) CIS genes identified in skin tumors. *P* value was calculated using a two-by-two contingency table and Fisher's exact test. **(e)** Distribution of overlapping skin CIS genes (n=143) between PSB and PISB screens (referred to as  $PSB \cap PISB$  CIS genes) across the 125 skin tumors analyzed. In each tumor,  $PSB \cap PISB$  CIS genes containing SB insertions are depicted as blue boxes. The histograms show the total number of  $PSB \cap PISB$  CIS genes with insertions per each tumor. Red horizontal lines represent the median of  $PSB \cap PISB$  CIS genes with insertions per PSB (left) and PISB (right) tumors, respectively. **(f)** Scattered plot showing the correlation between the frequency of PSB and PISB skin tumors with insertions in each single  $PSB \cap PISB$  CIS gene (n=143)

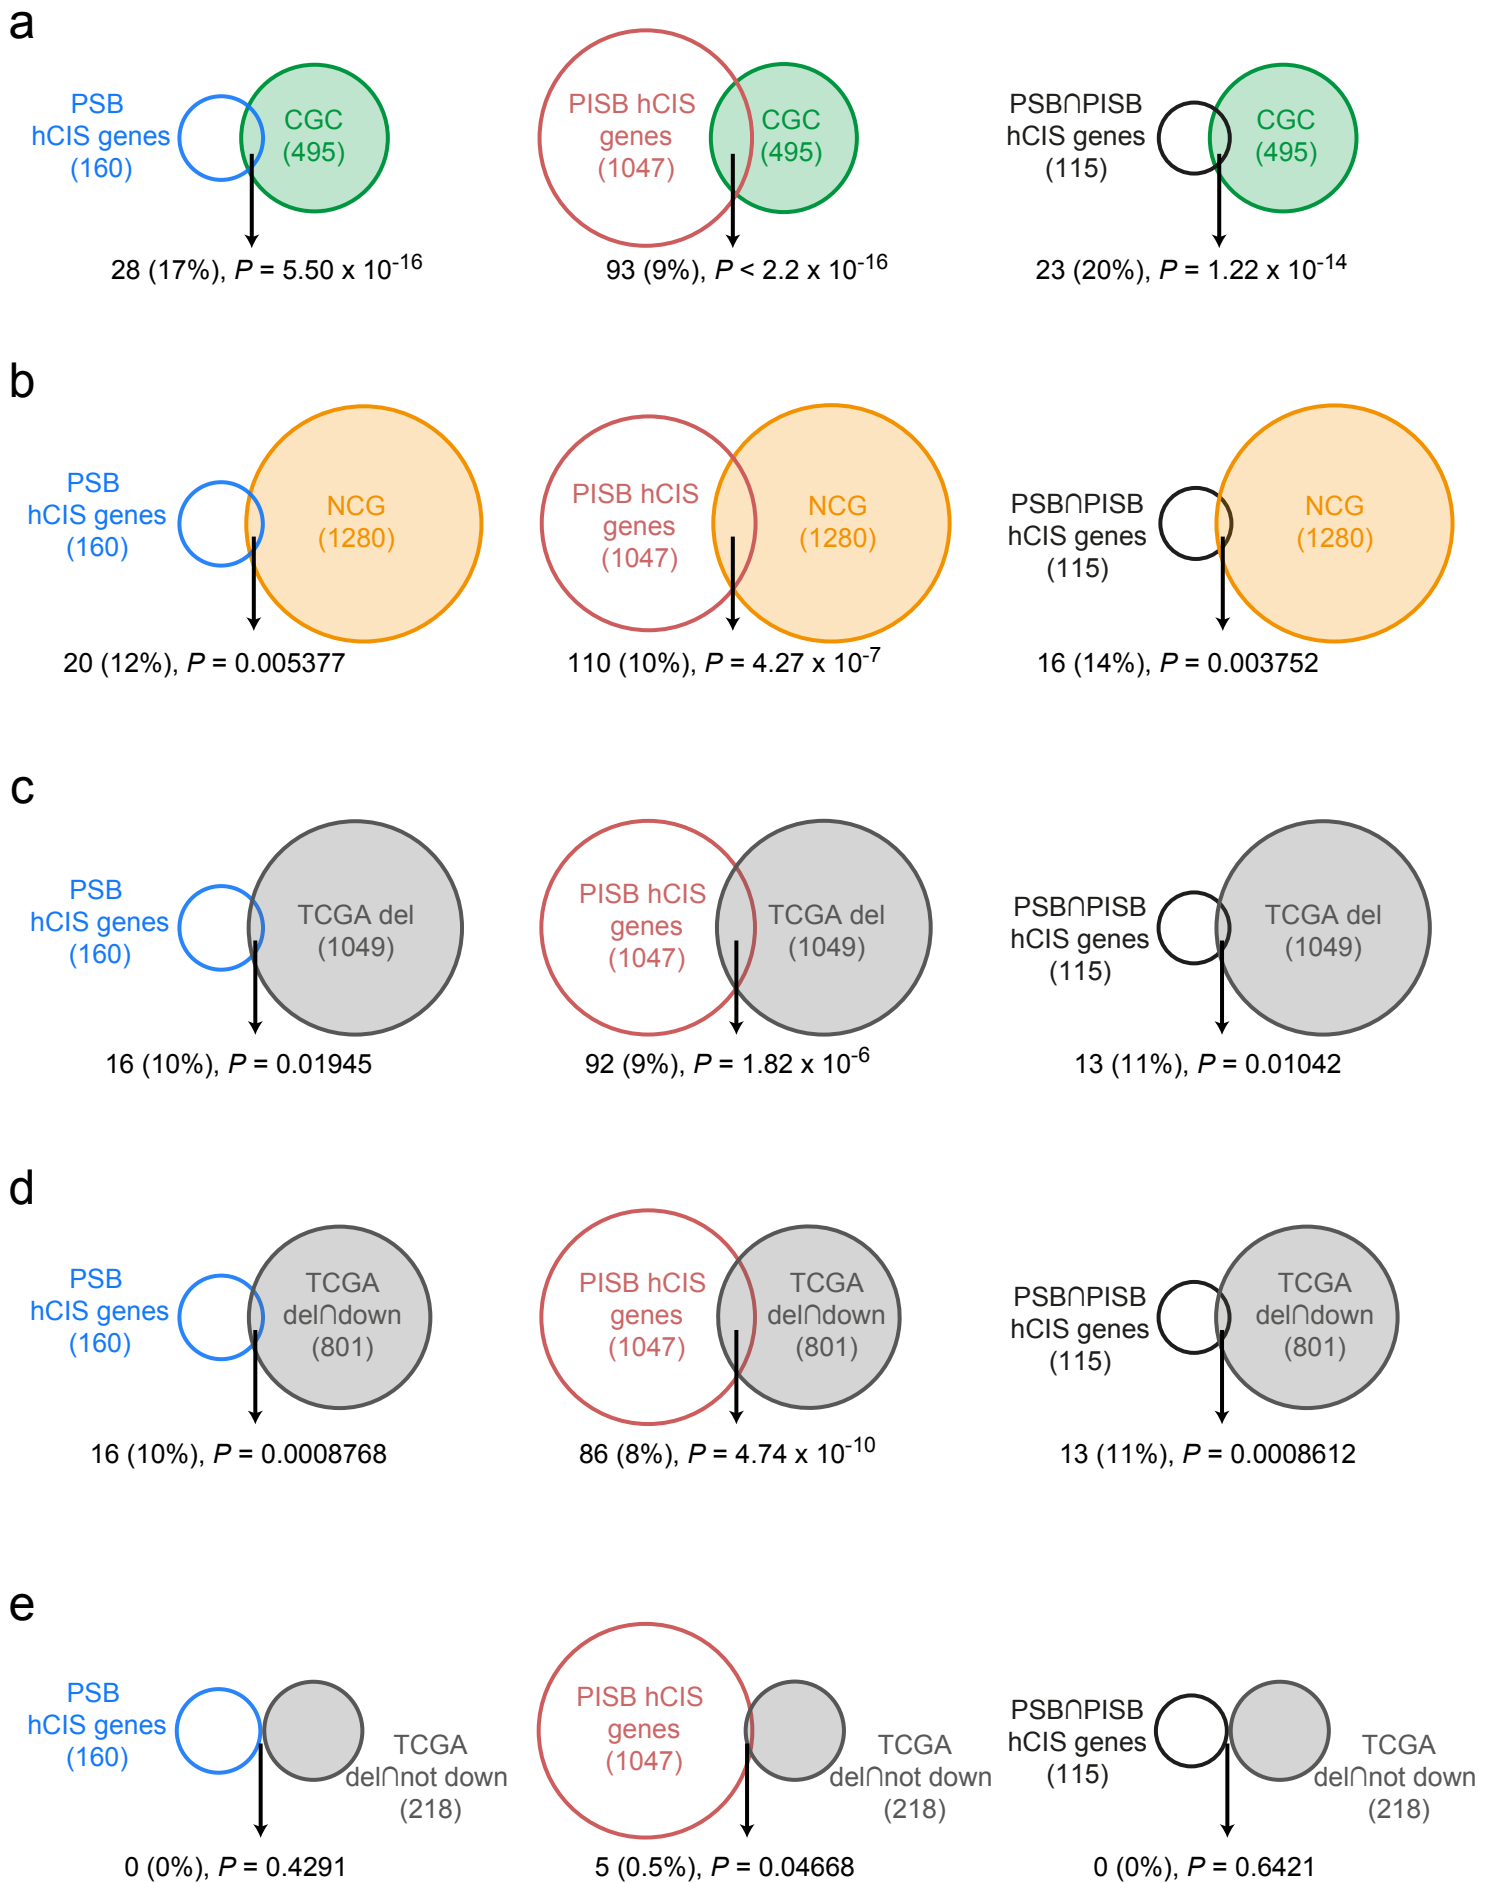

Supplementary Figure 4

**Supplementary Figure 4.** Cross-species comparisons of mouse hCIS and human cancer genes. Overlap of PSB, PISB and  $PSB \cap PISB$  hCIS genes with (a) genes listed in the Cancer Gene Census database, (b) candidate cancer genes registered in the Network of Cancer Genes (NCG) repository, (c) genes frequently deleted (> 4% of samples) in human prostate cancers available through The Cancer Genome Atlas (TCGA), (d) genes in c which are also significantly downregulated and (e) genes in c which are not significantly downregulated. The number of genes included in each group/dataset is indicated. Human genes whose mouse orthologues map to chromosomes 14 and 19 were not included in the analysis. Percentages in parenthesis represent the proportion of PSB, PISB or  $PSB \cap PISB$  hCIS overlapping with each of the three datasets. *P* values were calculated using a two-by-two contingency table and Fisher's exact test.



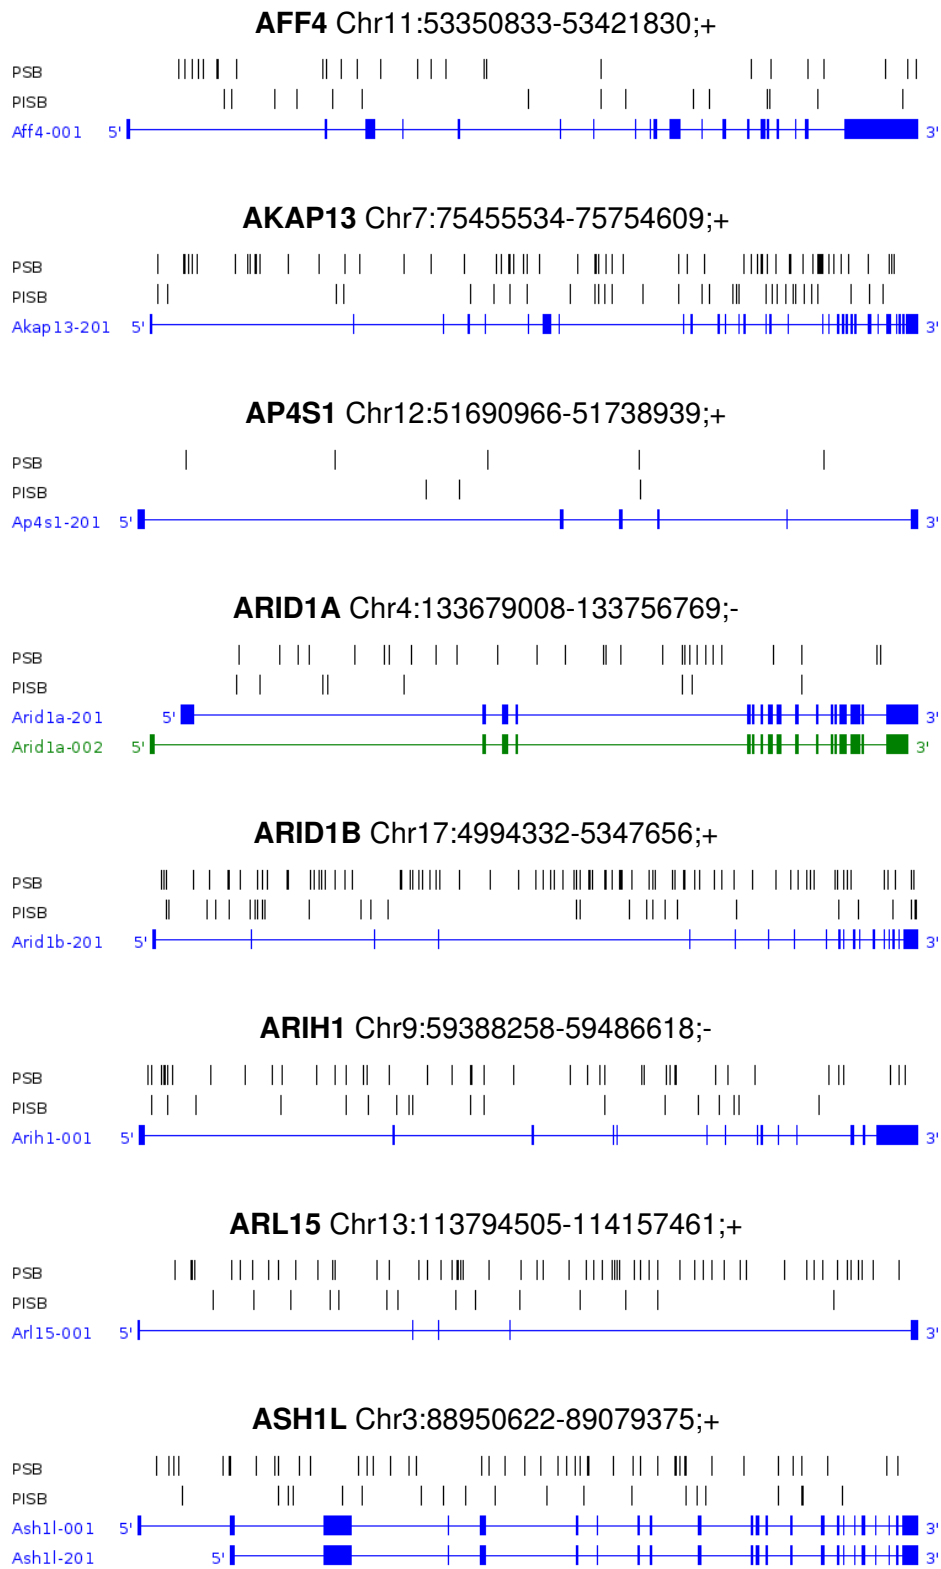

**ATP2A2** Chr5:122453513-122502225;-

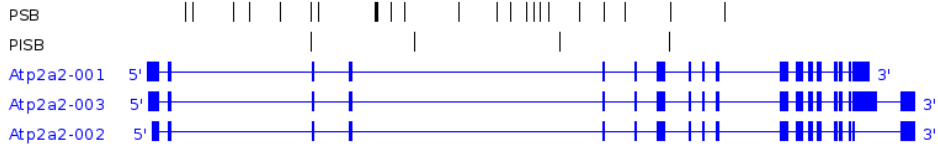

**BPTF** Chr11:107033081-107132127;-

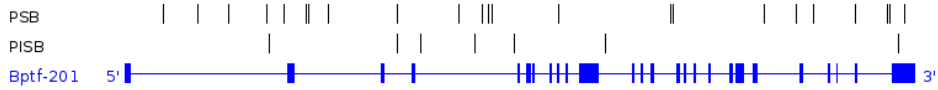

**BRD4** Chr17:32196274-32284722;-

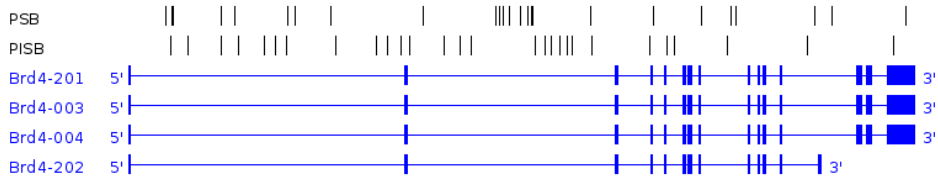

**CDC42** Chr4:137319696-137357720;-

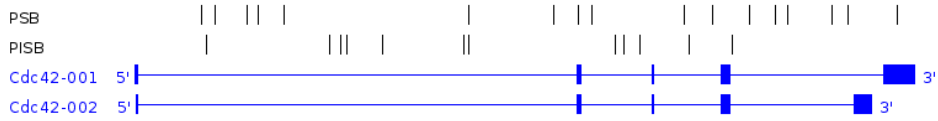

**CELF2** Chr2:6539694-7509563;-

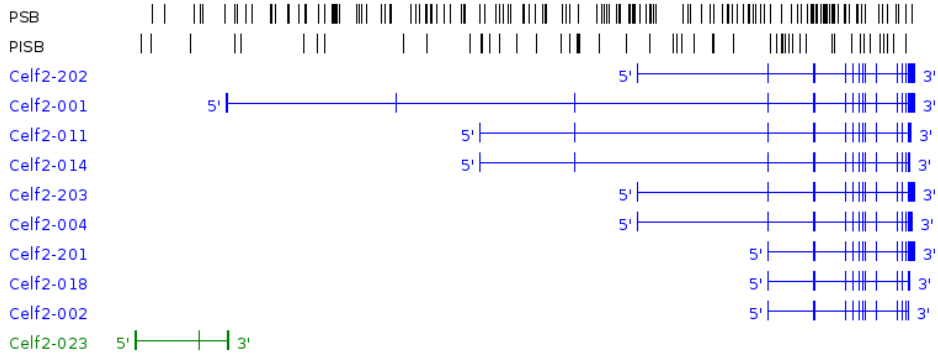

**CHD2** Chr7:73426638-73541830;-

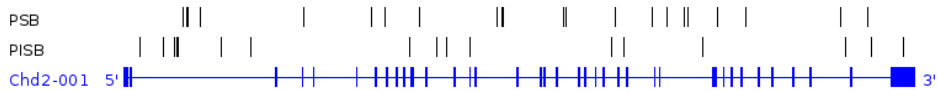



**CTCF** Chr8:105636568-105682922;+

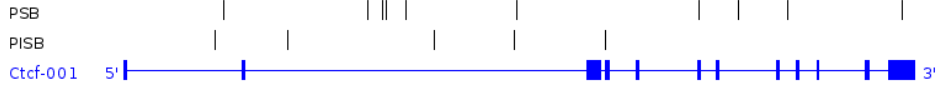

**CTNNA1** Chr18:35118888-35254773;+

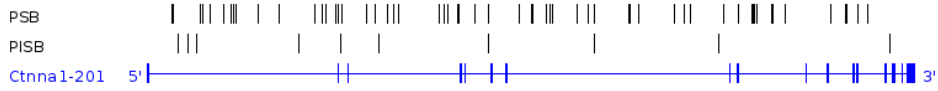

**CTNND1** Chr2:84600071-84650765;-

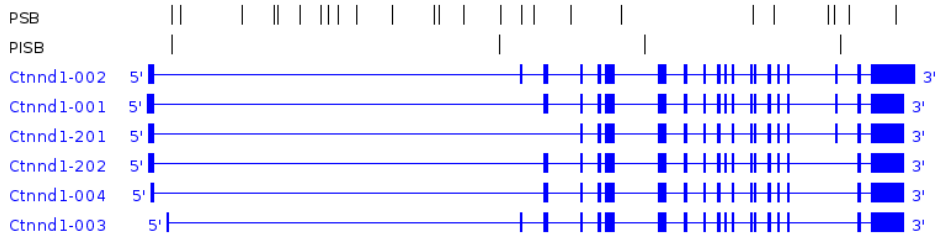

**CUL3** Chr1:80264923-80340480;-

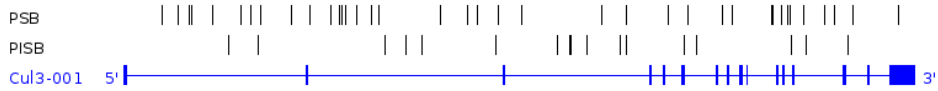

**DDX3Y** ChrY:1260771-1286629;-

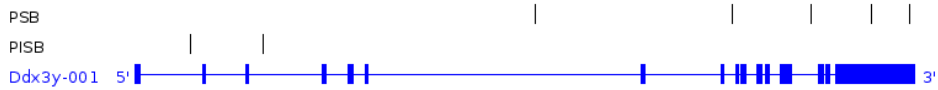

**DDX6** Chr9:44604892-44640731;+

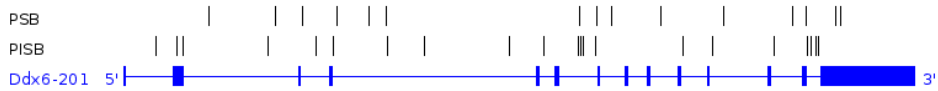

**DYRK1A** Chr16:94570010-94695517;+

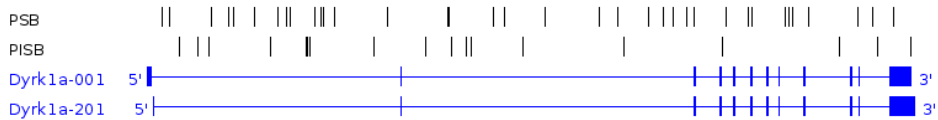



**ETV6** Chr6:134035700-134270158;+

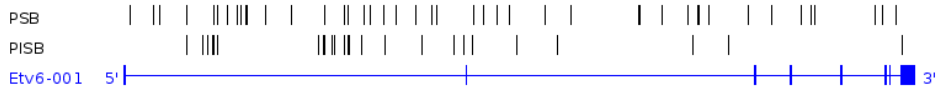

**FCHO2** Chr13:98723407-98815449;-

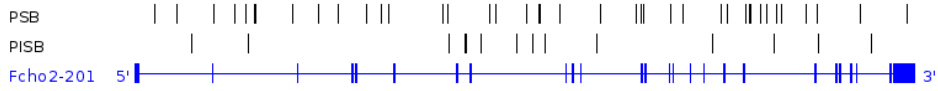

**FCHSD2** Chr7:101092863-101284405;+

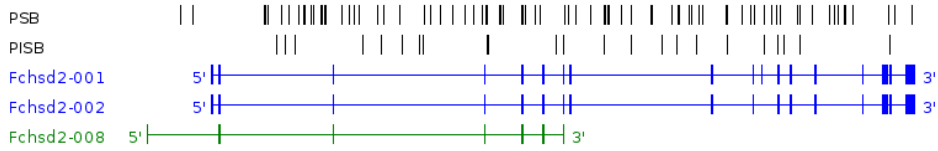

**FOXP1** Chr6:98925338-99522721;-

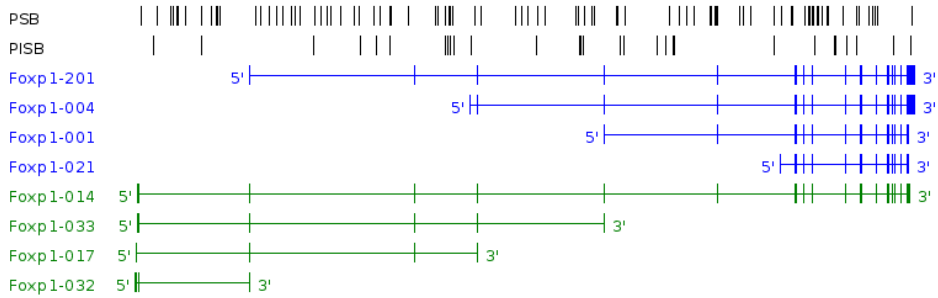

**FUBP1** Chr3:152210422-152236826;+

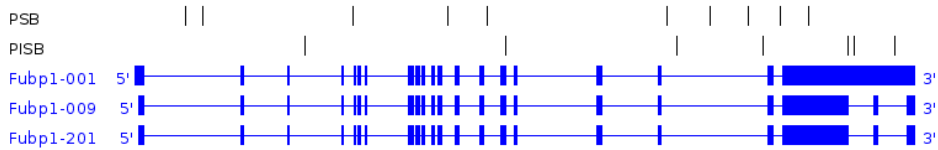

**GNB1** Chr4:155491361-155559269;+

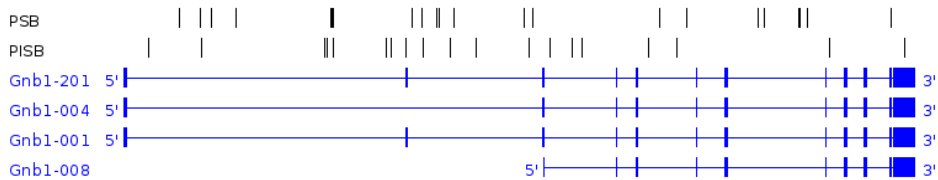

**GPBP1** Chr13:111425680-111490111;-

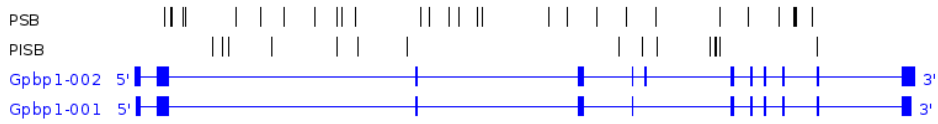

**HECTD1** Chr12:51743722-51829536;-

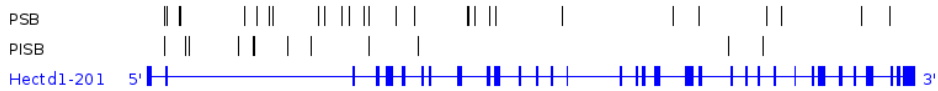

**HNRNPM** Chr17:33646233-33686860;-

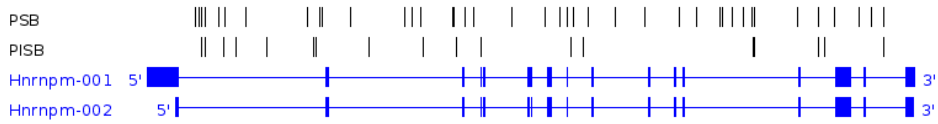

**IFT46** Chr9:44767908-44793447;+

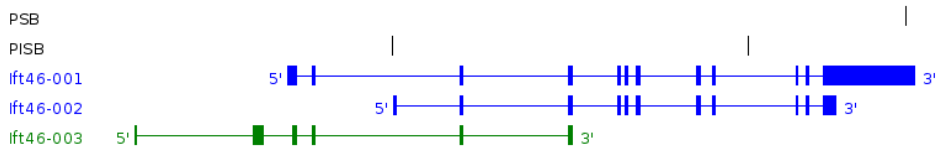

**IPO7** Chr7:110018274-110056609;+

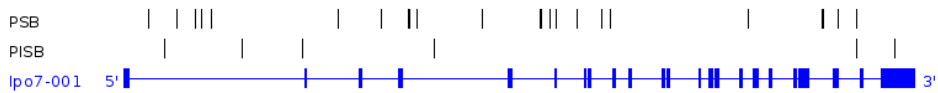

**ITSN2** Chr12:4593008-4713950;+

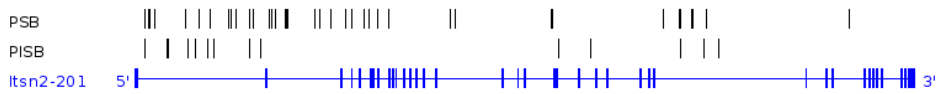

**KANSL1** Chr11:104333229-104468861;-

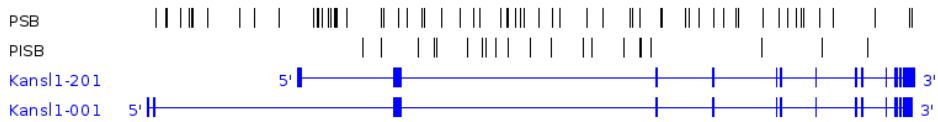

**KDM6A** ChrX:18162575-18279936;+

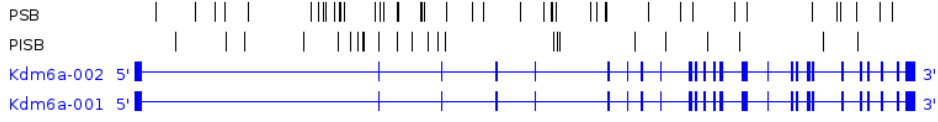

**KIF5B** Chr18:6201002-6242174;-

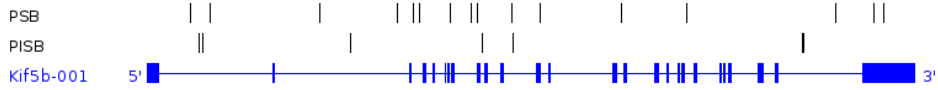

**LPP** Chr16:24393350-24992576;+

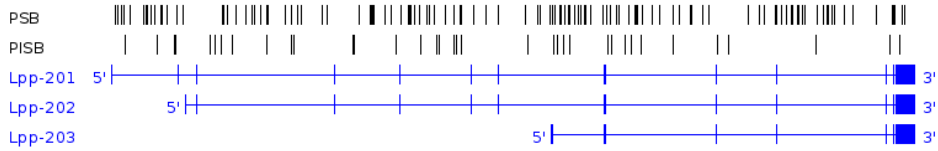

**LUC7L2** Chr6:38551334-38609470;+

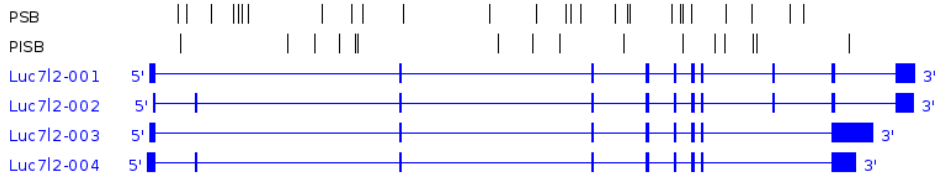

**MAGI3** Chr3:104013259-104220374;-

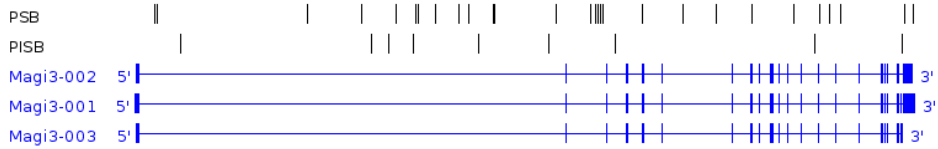

**MAP7** Chr10:20148471-20281590;+

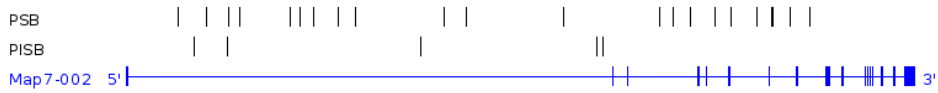



**MBNL1** Chr3:60472830-60629750;+

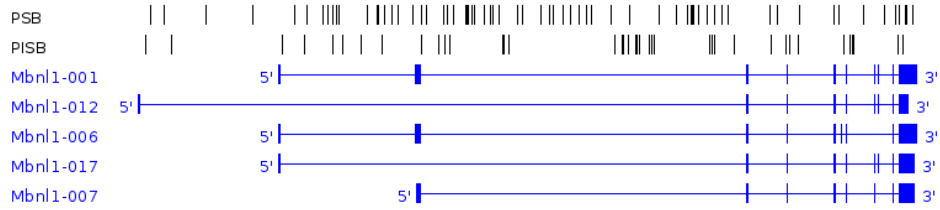

**MEIS1** Chr11:18879817-19018985;-

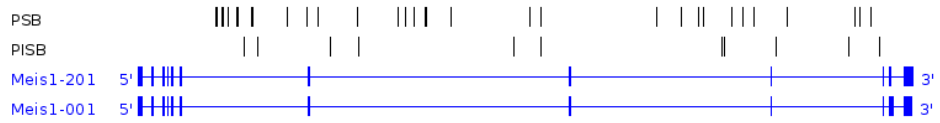

**MID1** ChrX:169685199-170005736;+

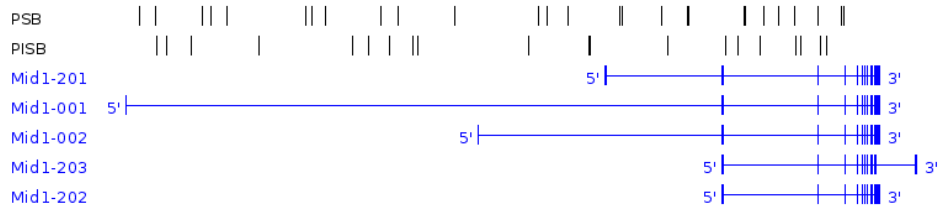

**MKL1** Chr15:81012281-81190757;-

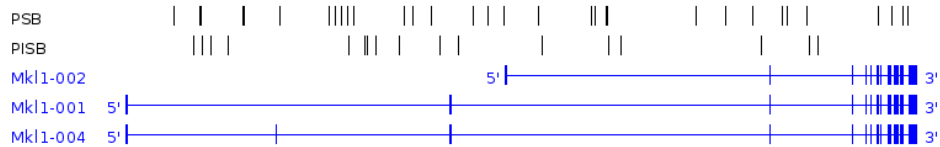

**KMT2A** Chr9:44803355-44881296;-

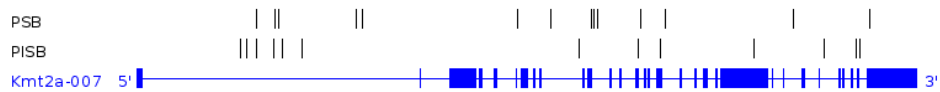

**KMT2E** Chr5:23434441-23504235;+

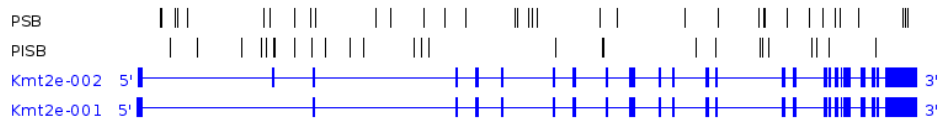



**NSD1** Chr13:55209782-55318325;+

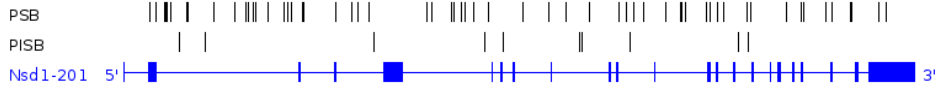

**PAK2** Chr16:32016290-32079342;-

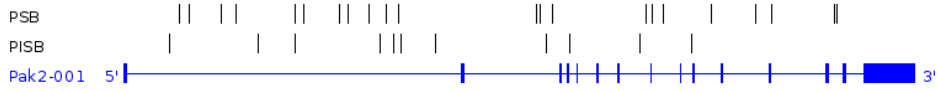

**PAN3** Chr5:147430161-147548502;+

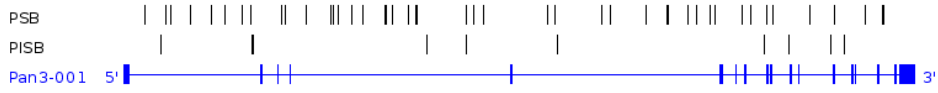

**PARD3** Chr8:127063893-127612286;+

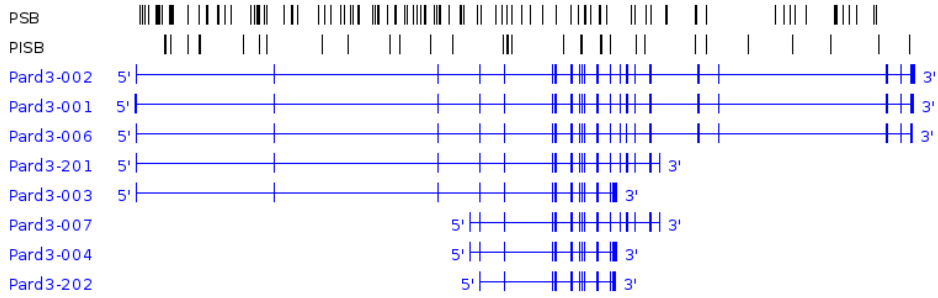

**PBX1** Chr1:168119364-168432270;-

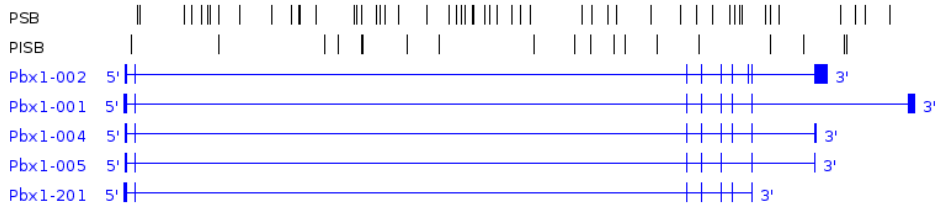

**PELI1** Chr11:21091291-21150323;+

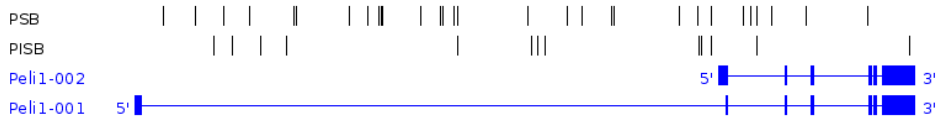

**PHIP** Chr9:82866159-82975516;-

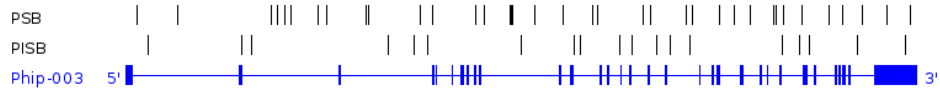

**PIK3R1** Chr13:101680563-101768217;-

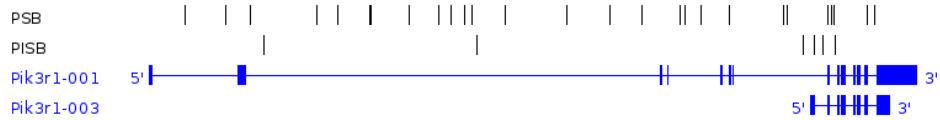

**PPP1R12A** Chr10:108162400-108277575;+

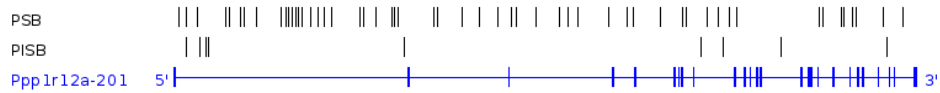

**PTBP3** Chr4:59471868-59549364;-

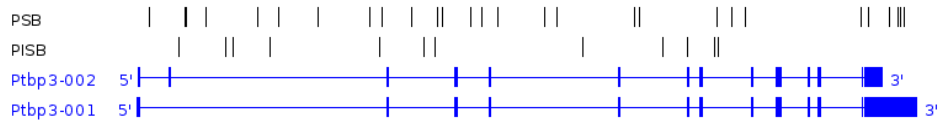

**PTPRC** Chr1:138062861-138175708;-

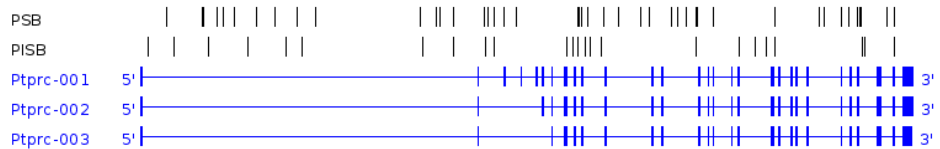

**PUM1** Chr4:130663321-130781564;+

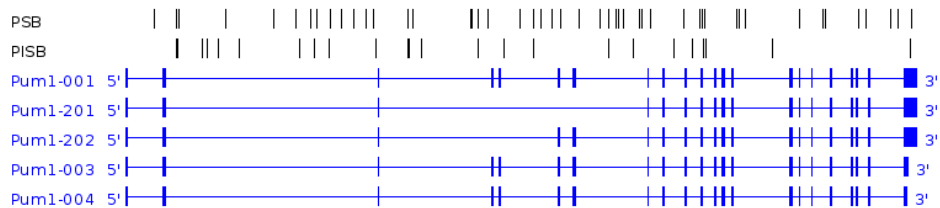

**RAB10** Chr12:3247430-3309969;-

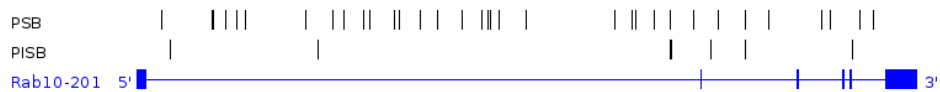

**RASA1** Chr13:85214780-85289029;-

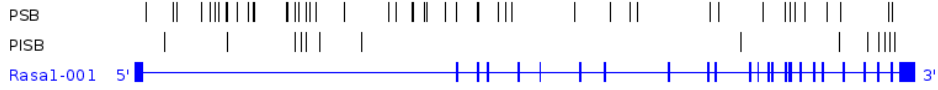

**RBM39** Chr2:156147239-156180238;-

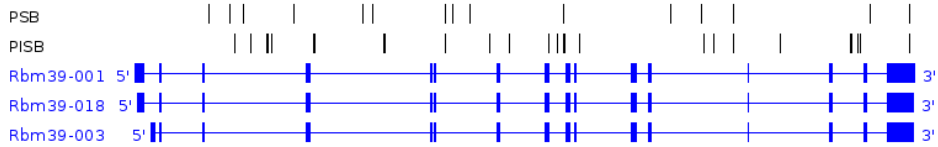

**RBM6** Chr9:107773559-107873237;-

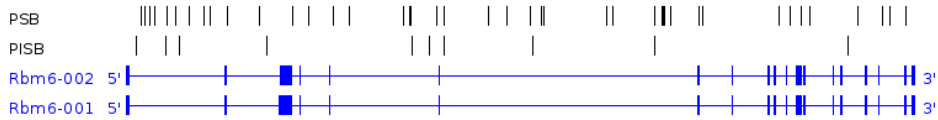

**RHOA** Chr9:108306129-108337934;+

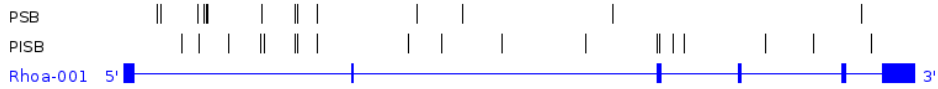

**RRBP1** Chr2:143947395-144011263;-

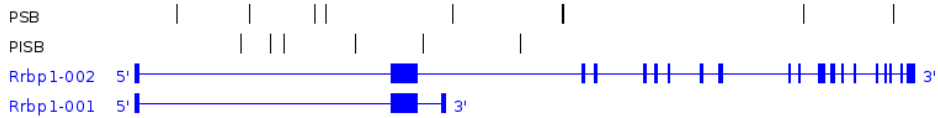

**SEC63** Chr10:42761496-42832514;+

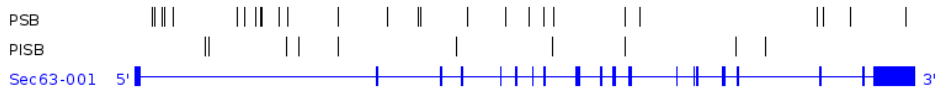

**SF3B1** Chr1:54985169-55027481;-

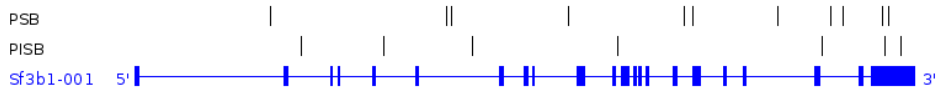

**SFPQ** Chr4:127021324-127037013;+

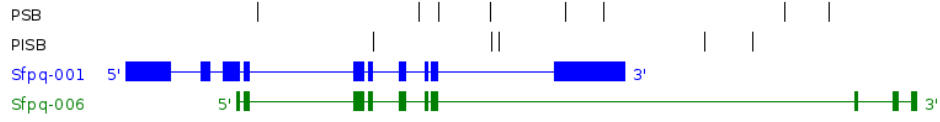

**SNX2** Chr18:53176365-53220860;+

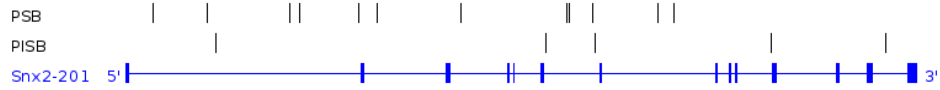

**SP3** Chr2:72936427-72980446;-

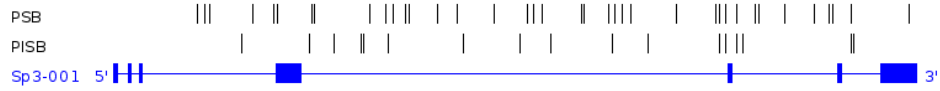

**SRSF4** Chr4:131873617-131901706;+

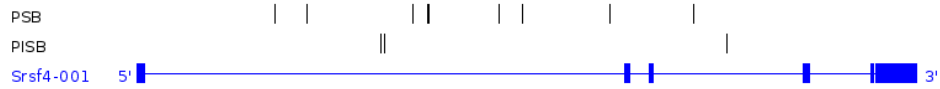

**ST5** Chr7:109523911-109703605;-

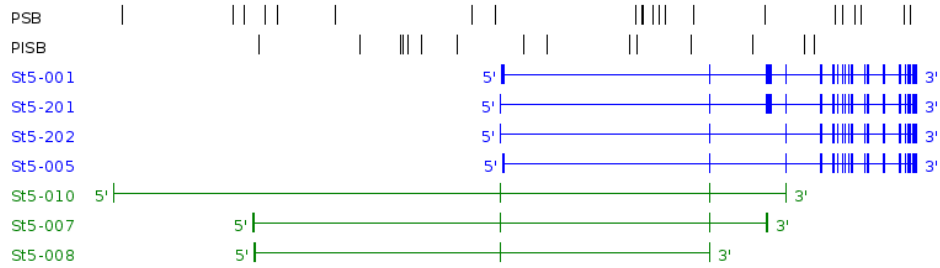

**TBL1X** ChrX:77511013-77662983;+

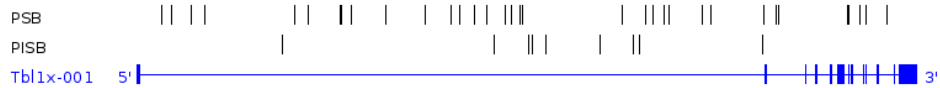

**TBL1XR1** Chr3:22076652-22216594;+

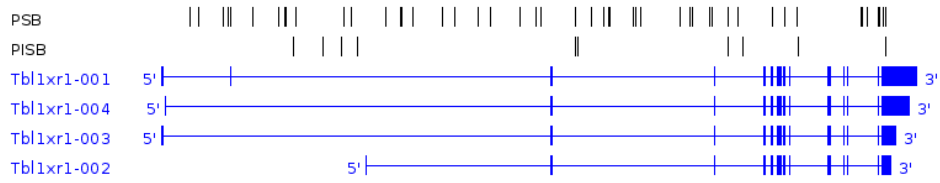

**TLK1** Chr2:70712407-70825728;-

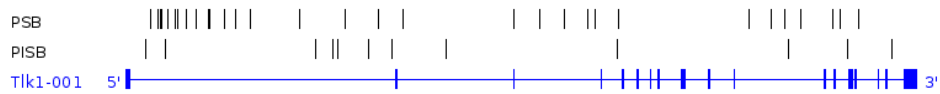

**TNPO1** Chr13:98839019-98926384;-

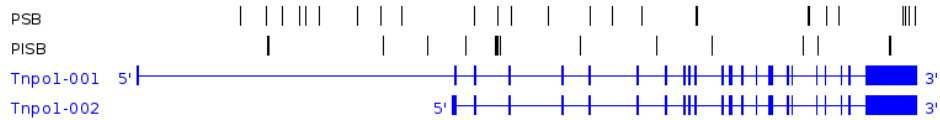

**TNRC6B** Chr15:80711319-80941086;+

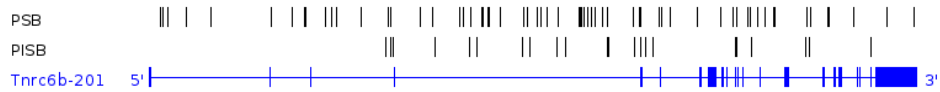

**TRIP12** Chr1:84721189-84840516;-

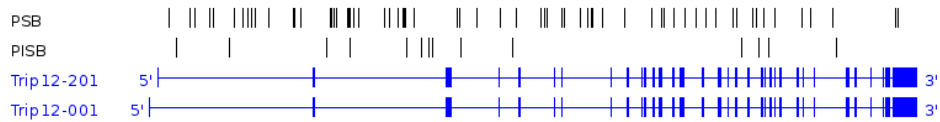

**UBA1Y** ChrY:818649-844224;+

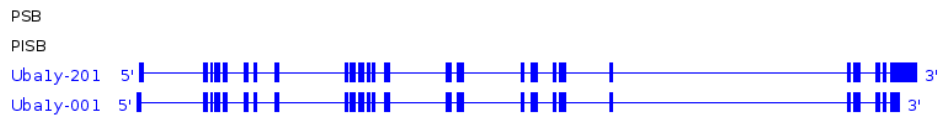

**UBE2D3** Chr3:135438149-135468198;+

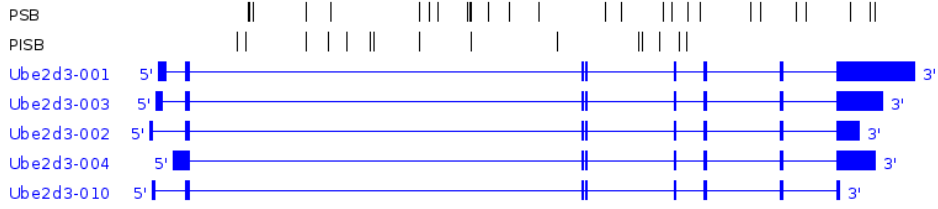

**UBE2N** Chr10:95515162-95545658;+

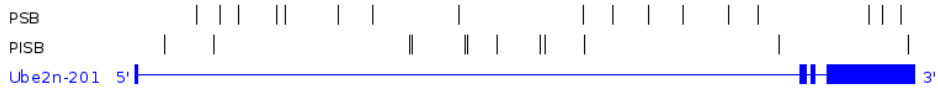

**UBE3A** Chr7:59228750-59311536;+

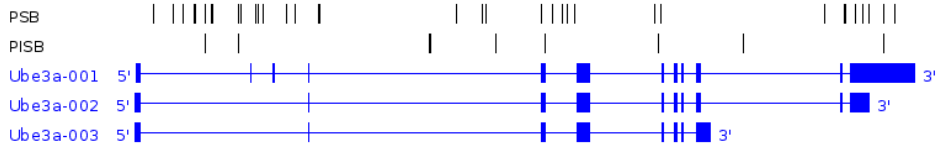

**USP7** Chr16:8689595-8792308;-

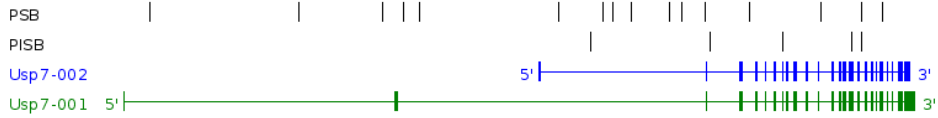

**USP9Y** ChrY:1298961-1459782;-

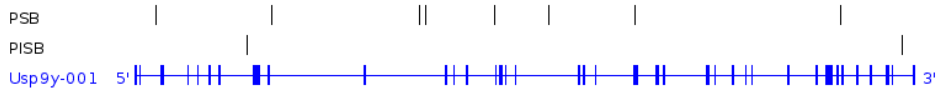

**UTY** ChrY:1096861-1245759;-

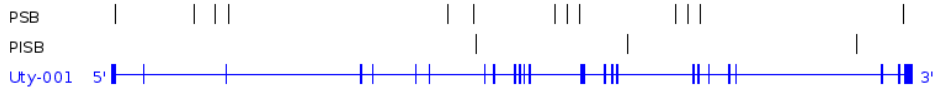



**WAC** Chr18:7868832-7973547;+

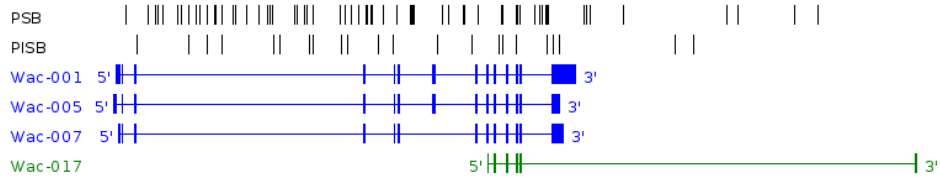

**WDFY3** Chr5:101832956-102069921;-

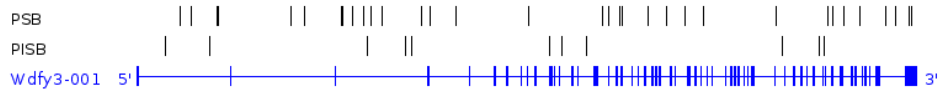

**YTHDF2** Chr4:132184912-132212303;-

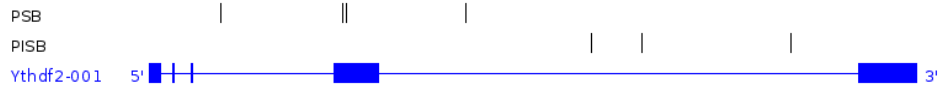

**YTHDF3** Chr3:16183212-16217037;+

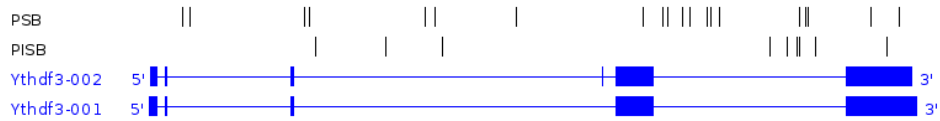

**YWHAE** Chr11:75732869-75765845;+

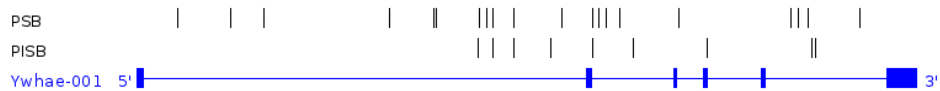

**YY1** Chr12:108792973-108816632;+

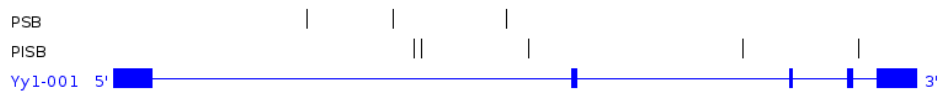

**ZBTB20** Chr16:42875881-43642602;+

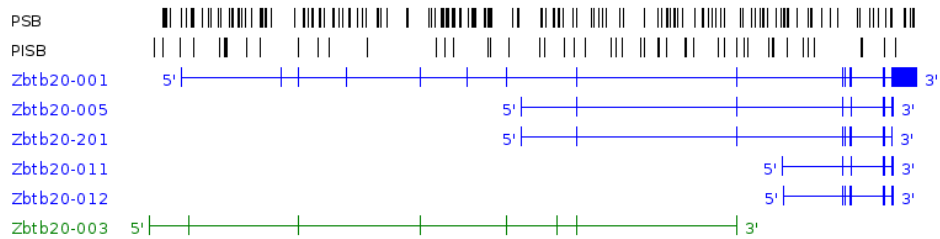

**ZFAND3** Chr17:30005087-30210019;+

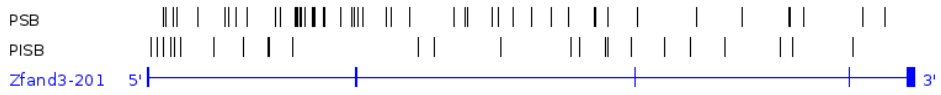

**ZFP148** Chr16:33380775-33503903;+

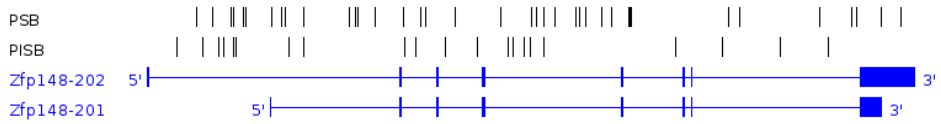

**ZFP292** Chr4:34803113-34882960;-

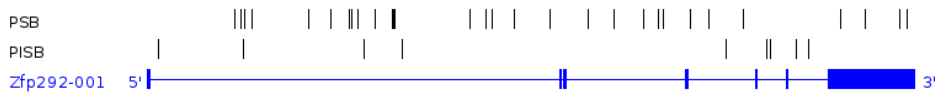

**ZFY1** ChrY:725128-797409;-

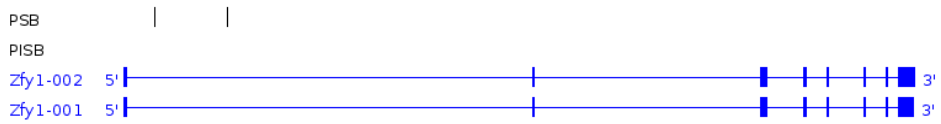

**ZFY2** ChrY:2106015-2170409;-

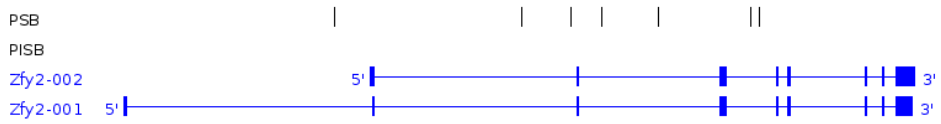

**2010111I01RIK** Chr13:63014934-63326096;+

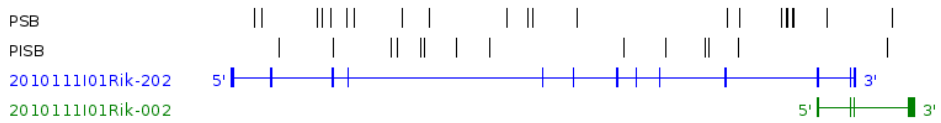

**Supplementary Figure 5.** Transposon integration pattern across the  $PSB \cap PISB$  CIS genes in PSB and PISB prostate tumors. Only the transposon insertions falling in the genes nearest to the center of each CIS peak are represented. Only the consensus CDS (CCDS) transcripts are shown (blue) unless these cover less than 98% of the annotated gene length, in which case non-CCDS transcripts are also depicted (green). Genes without insertions correspond to the gene closest to the center of an intergenic CIS.

**ARIH1** Chr9:59388258-59486618;-

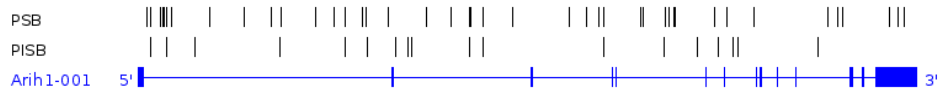

**CHD2** Chr7:73426638-73541830;-

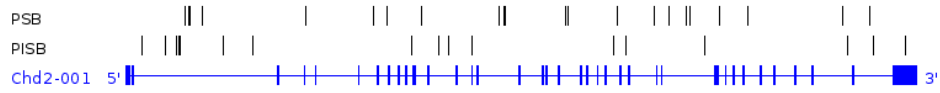

**CUL3** Chr1:80264923-80340480;-

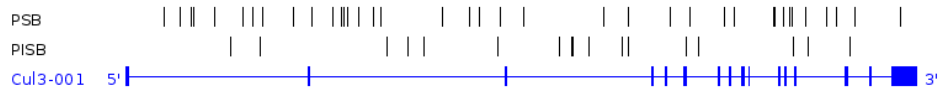

**DYRK1A** Chr16:94570010-94695517;+

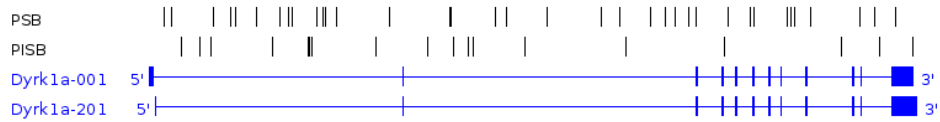

**GM10800** Chr2:98666547-98667301;-

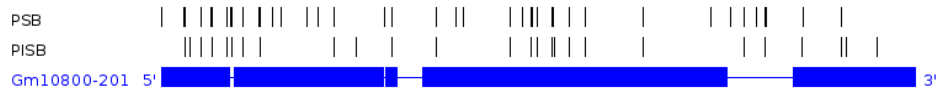

**GM10801** Chr2:98662237-98664083;+

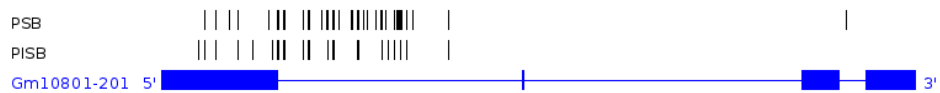

**GM16026** Chr1:85266698-85285491;+

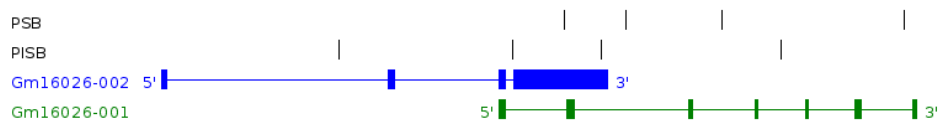

**HSPA4** Chr11:53259814-53300457;-

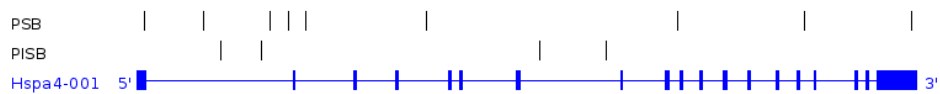

**KANSL1** Chr11:104333229-104468861;-

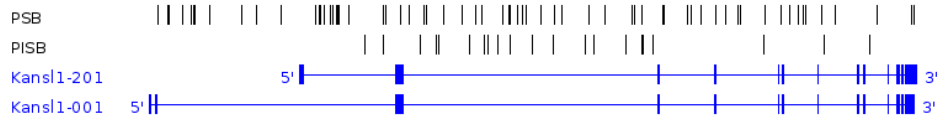

**NF1** Chr11:79339693-79581612;+

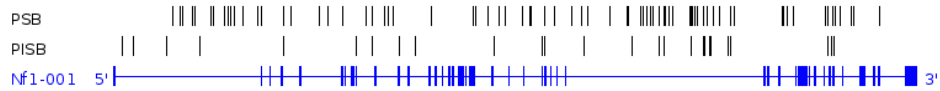

**OSMR** Chr15:6813577-6874969;-

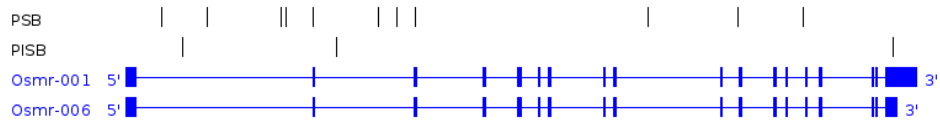

**PCSK7** Chr9:45906497-45929726;+

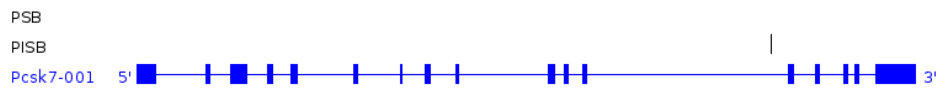

**PIAS1** Chr9:62878368-62987924;-

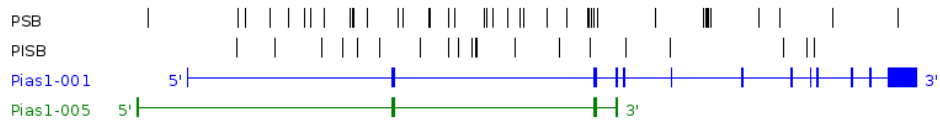

**PRL2C2** Chr13:12996132-13005383;-

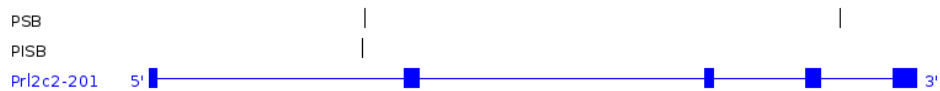

**RALGAPB** Chr2:158409848-158499253;+

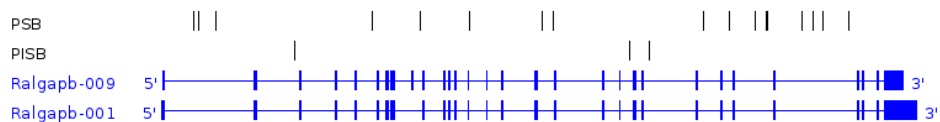

**TNRC6B** Chr15:80711319-80941086;+

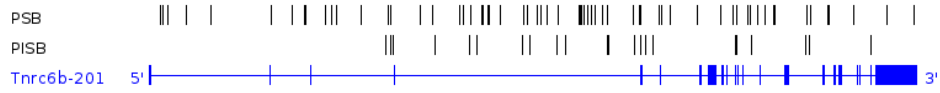

**TRP53** Chr11:69580359-69591873;+

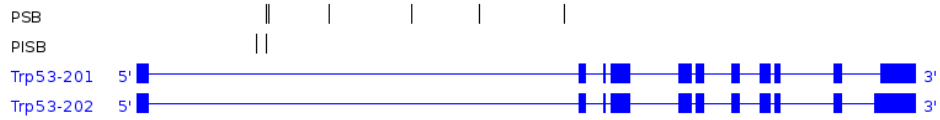

**TRPS1** Chr15:50654752-50890463;-

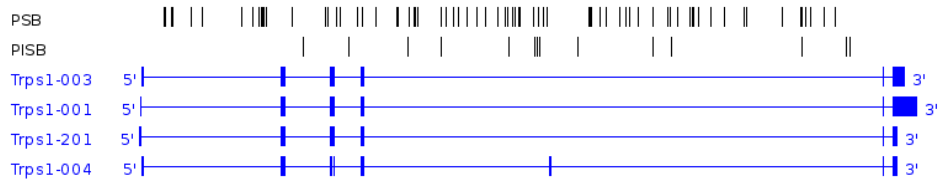

**UBA1** ChrX:20658326-20683179;+

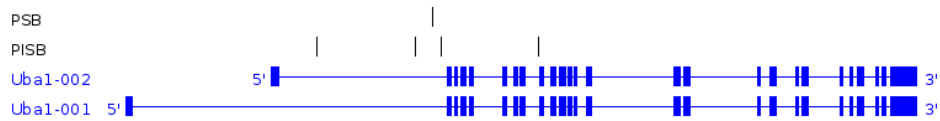

**Supplementary Figure 6.** Transposon integration pattern across the PSB $\cap$ PISB CIS genes in PSB and PISB breast tumors. Only the transposon insertions falling in the genes nearest to the center of each CIS peak are represented. For these genes, only the consensus CDS (CCDS) transcripts are shown (blue) unless these cover less than 98% of the annotated gene length, in which case non-CCDS transcripts are also depicted (green).

**ABI1** Chr2:22940073-23040241;-

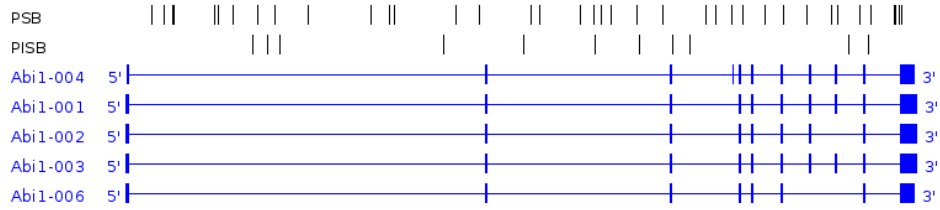

**ACTR2** Chr11:20062304-20112913;-

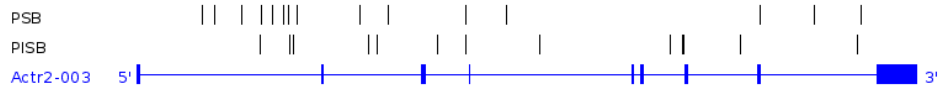

**ACTR3** Chr1:125392905-125435727;-

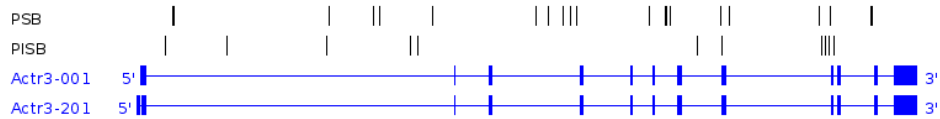

**AI314180** Chr4:58798911-58912749;-

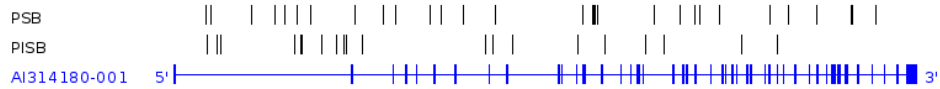

**AKAP13** Chr7:75455534-75754609;+

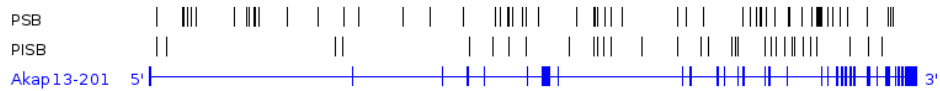

**ANKHD1** Chr18:36559987-36665917;+

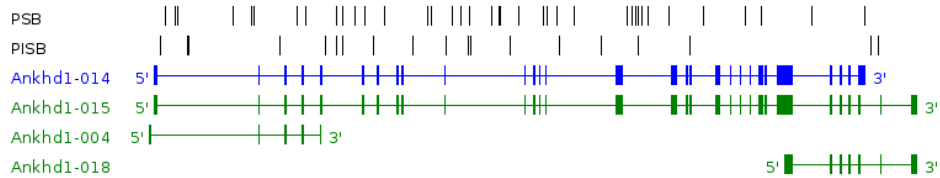

**ARIH1** Chr9:59388258-59486618;-

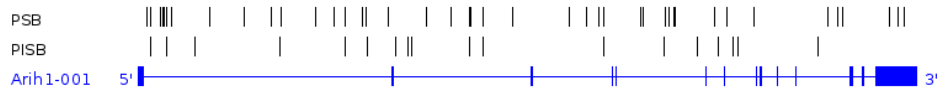



**ASAP1** Chr15:64086857-64382919;-

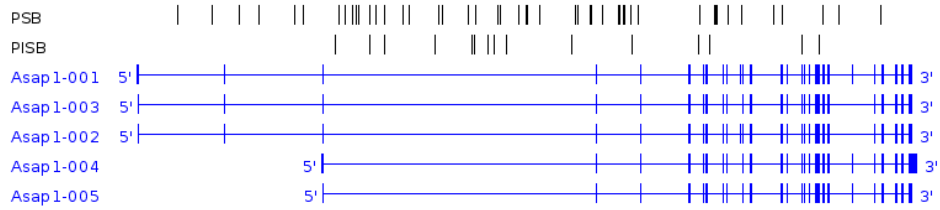

**ASH1L** Chr3:88950622-89079375;+

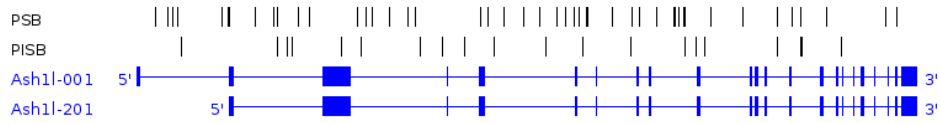

**ATAD2B** Chr12:4917404-5044047;+

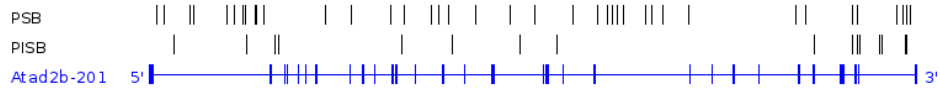

**ATXN1** Chr13:45549758-45964991;-

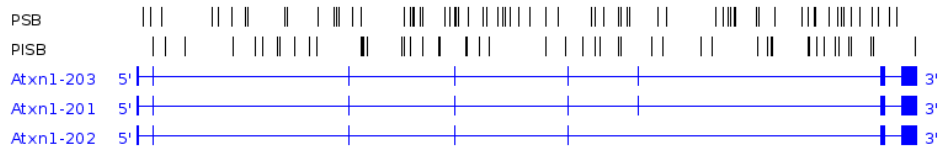

**BIRC6** Chr17:74528295-74703356;+

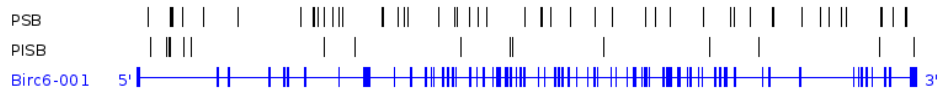

**BMPR2** Chr1:59763400-59879014;+

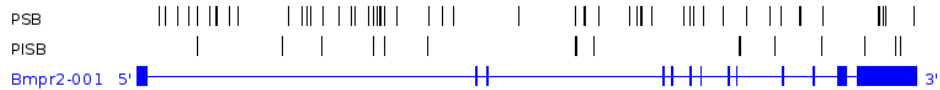



**CHD2** Chr7:73426638-73541830;-

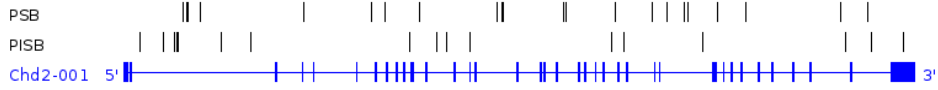

**CHL1** Chr6:103510586-103750211;+

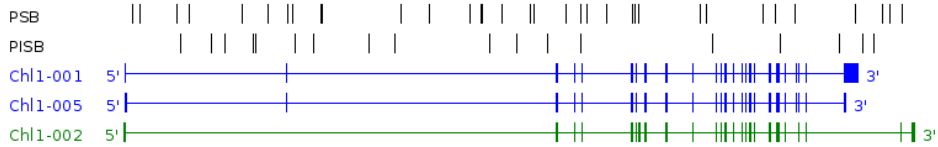

**CLDN34D** ChrX:76582610-76602924;-

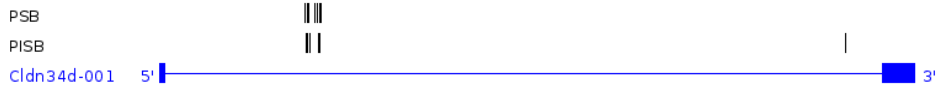

**CNOT2** Chr10:116485161-116581511;-

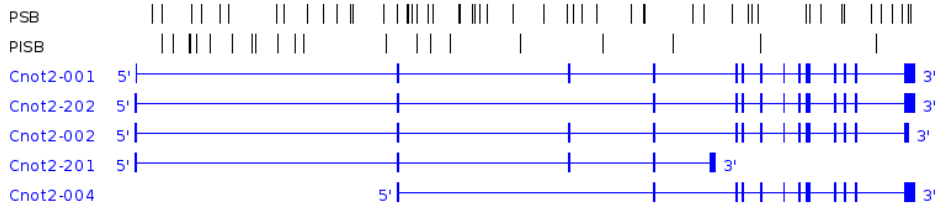

**CREBBP** Chr16:4081328-4213997;-

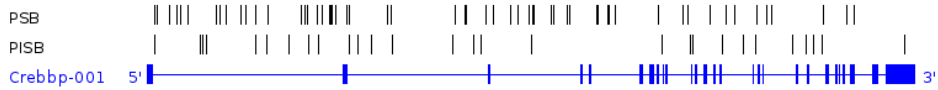

**CSNK1G1** Chr9:65908924-66045015;+

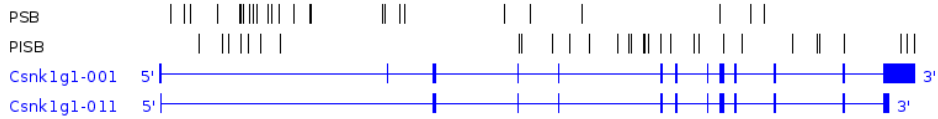

**CUL3** Chr1:80264923-80340480;-

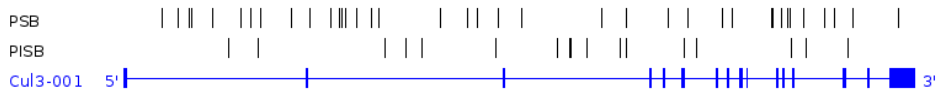

**D17WSU92E** Chr17:27751232-27820558;-

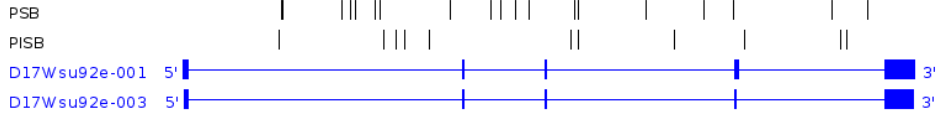

**DDX3Y** ChrY:1260771-1286629;-

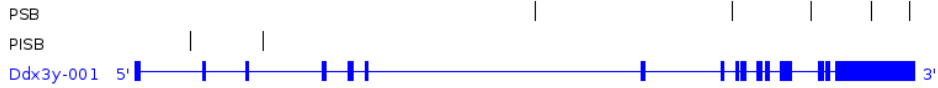

**DGKB** Chr12:37880705-38633410;+

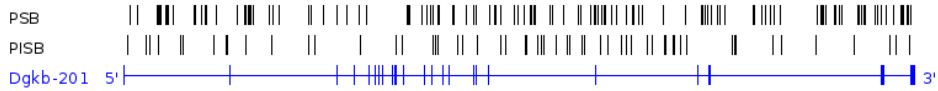

**DSC3** Chr18:19960930-20002097;-

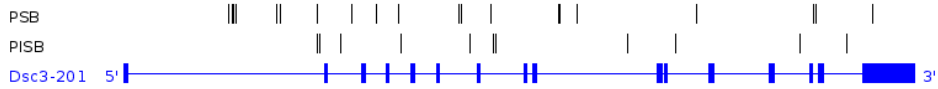

**DYRK1A** Chr16:94570010-94695517;+

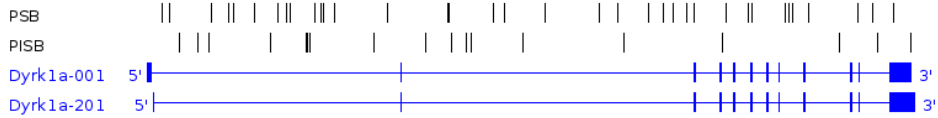

**ELMO1** Chr13:20090596-20606528;+

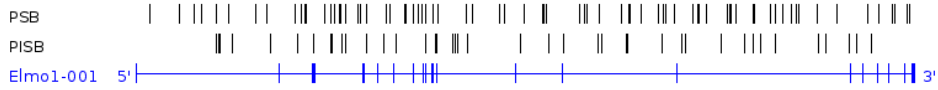

**EPC1** Chr18:6435951-6516108;-

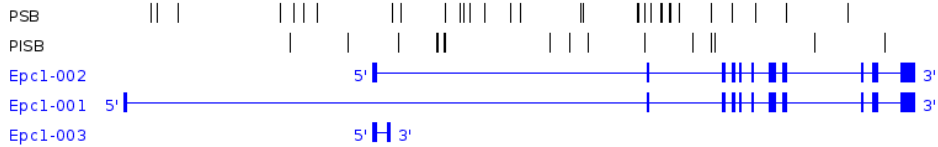

**ETV6** Chr6:134035700-134270158;+

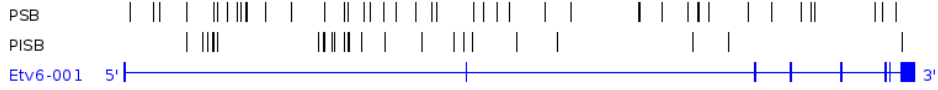

**FAM193A** Chr5:34369933-34486456;+

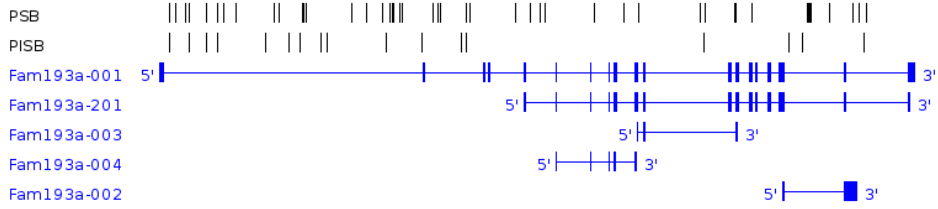

**FBXO11** Chr17:87990859-88065291;-

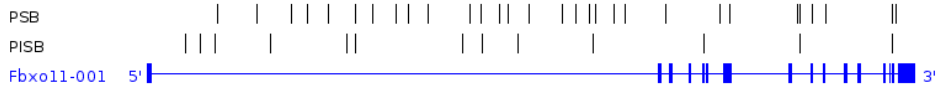

**FBXW11** Chr11:32642724-32746816;+

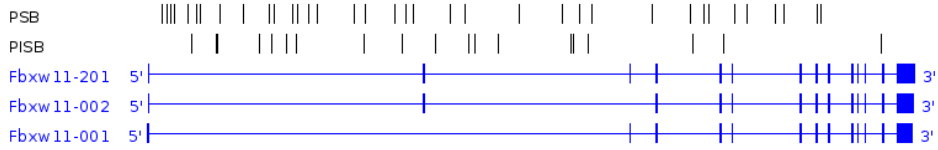

**FCHSD2** Chr7:101092863-101284405;+

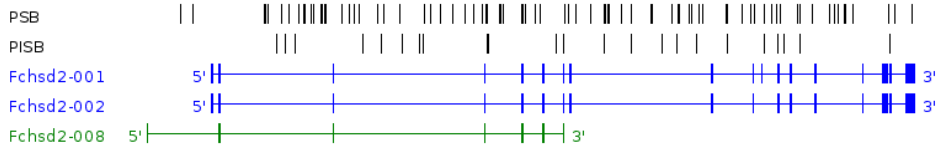

**FRYL** Chr5:73019987-73256619;-

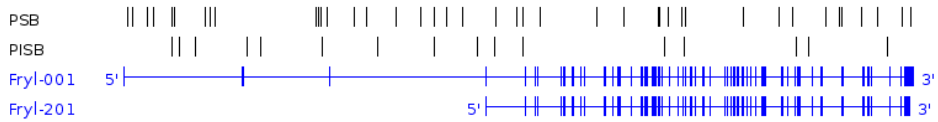

**FUT8** Chr12:77238104-77476338;+

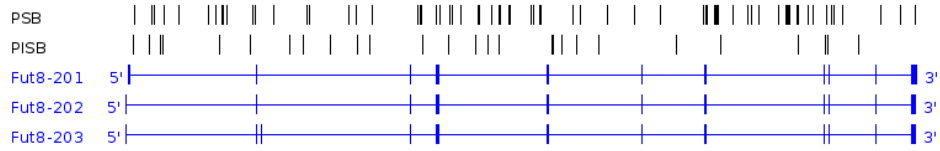

**GATAD2B** Chr3:90293178-90363407;+

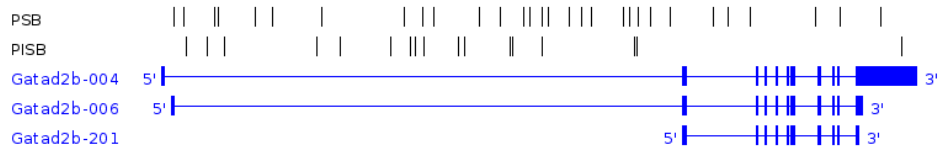

**GIGYF2** Chr1:87326998-87450796;+

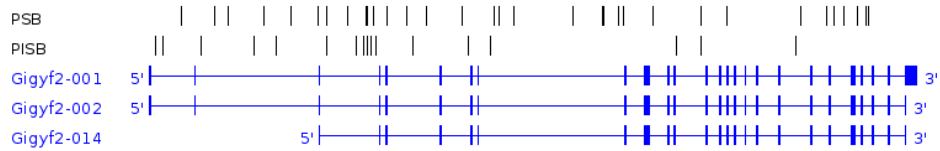

**GM10800** Chr2:98666547-98667301;-

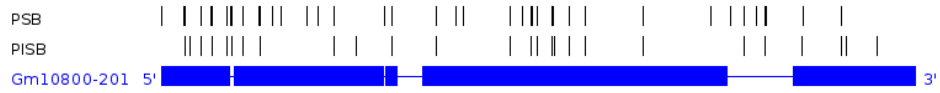

**GM10801** Chr2:98662237-98664083;+

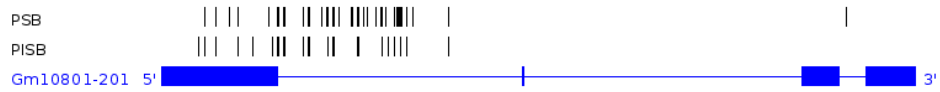

**GM16490** Chr18:35770318-35770668;+

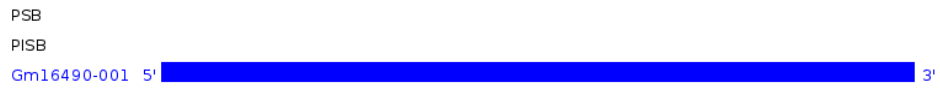

**GM19710** Chr3:89998760-90021445;+

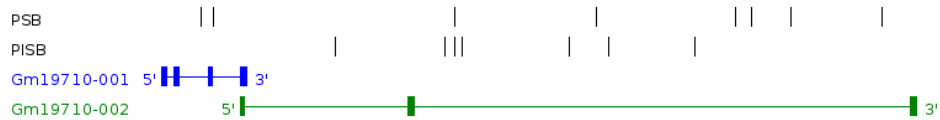

**GM20388** Chr8:119910841-124345722;+

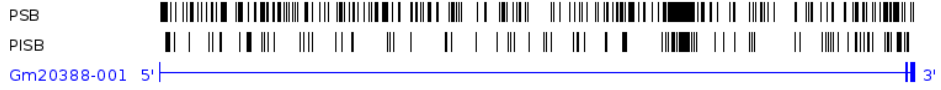

**GM26870** Chr9:3000282-3038313;-

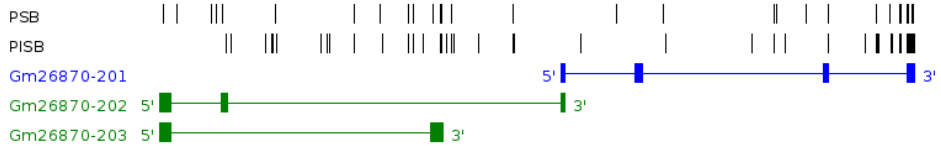

**GM28412** ChrY:3909381-3909557;+

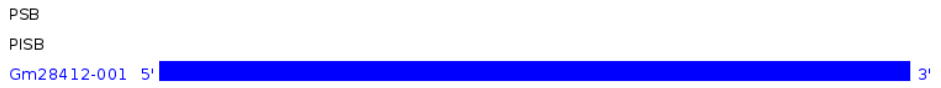

**GM28507** ChrY:10019064-10019766;-

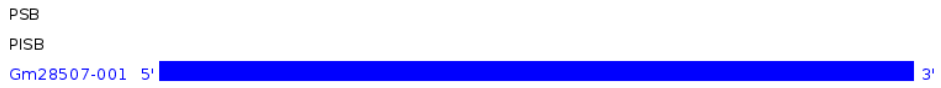

**GM29277** ChrY:206151-207788;+

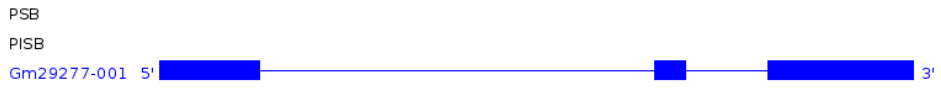

**GM5614** Chr9:35281518-35281835;-

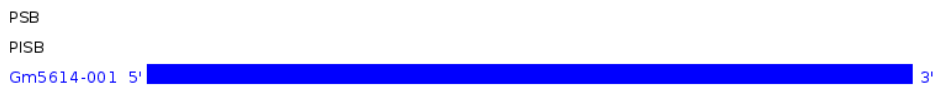

**GM9075** Chr12:3082667-3087041;+

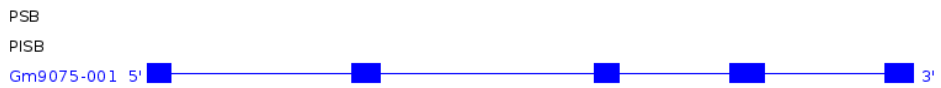

**GNB1** Chr4:155491361-155559269;+

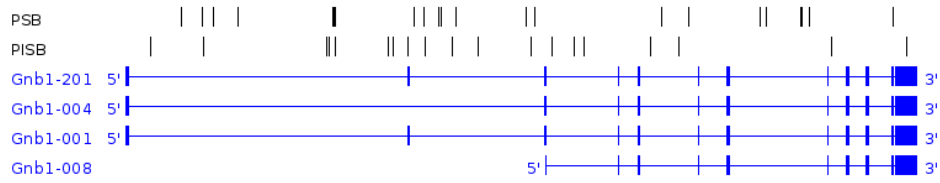

**GPATCH8** Chr11:102475915-102556392;-

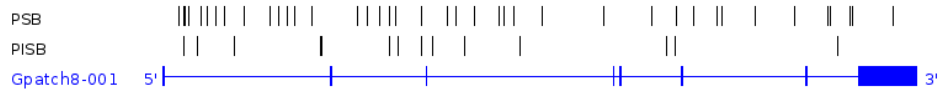

**GPBP1** Chr13:111425680-111490111;-

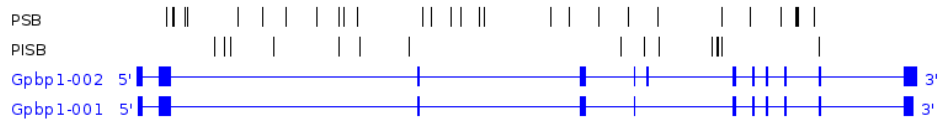

**HECTD1** Chr12:51743722-51829536;-

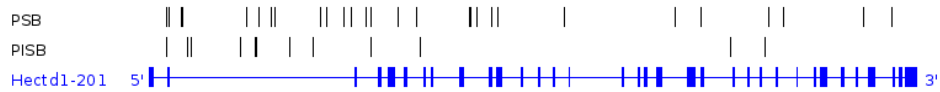

**HNRNPM** Chr17:33646233-33686860;-

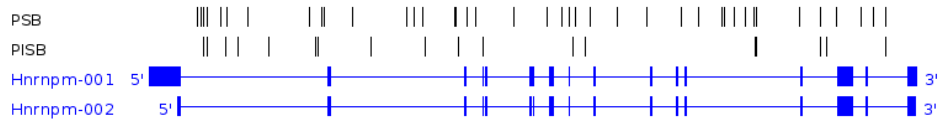

**IRF2** Chr8:46739732-46847458;+

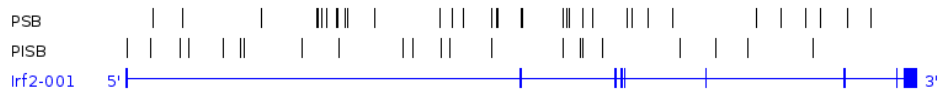

**ITSN2** Chr12:4593008-4713950;+

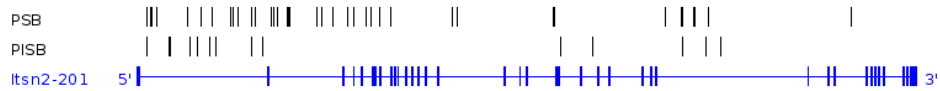





**LSM14A** Chr7:34344646-34393315;-

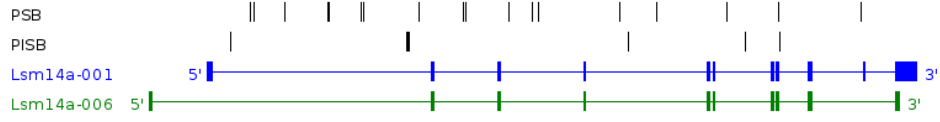

**LUC7L2** Chr6:38551334-38609470;+

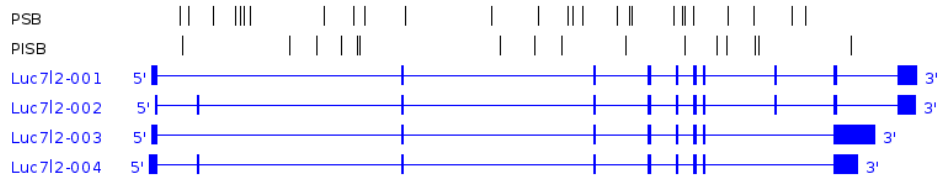

**MATR3** Chr18:35562146-35593835;+

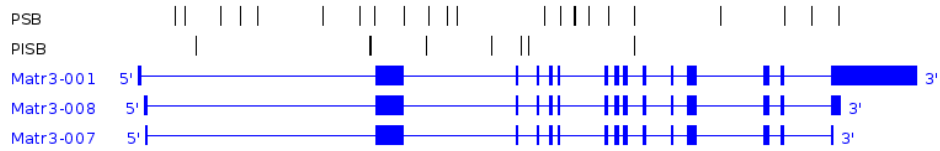

**MBNL1** Chr3:60472830-60629750;+

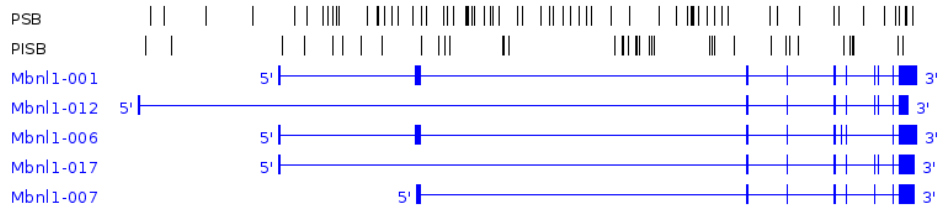

**MED13L** Chr5:118560679-118765438;+

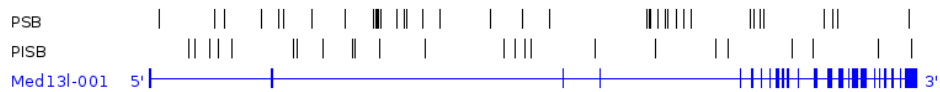

**MEF2A** Chr7:67231163-67372858;-

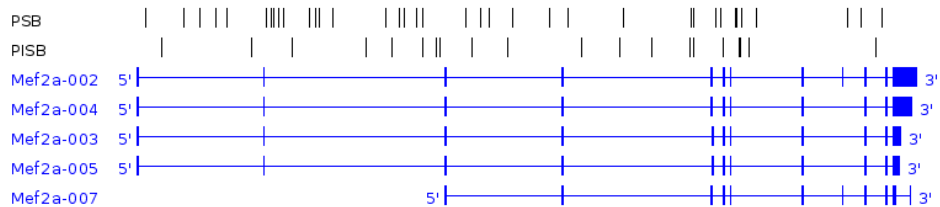



**NR3C1** Chr18:39410545-39491301;-

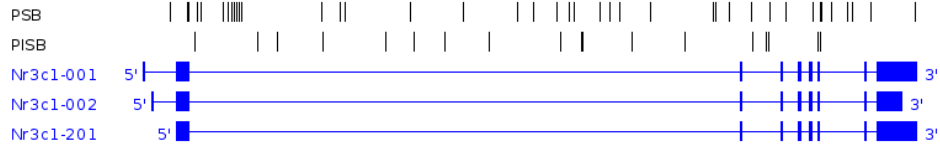

**PAFAH1B1** Chr11:74673949-74724670;-

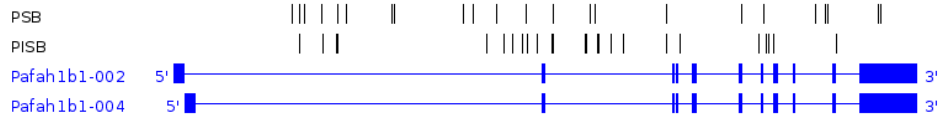

**PAIP2** Chr18:35598617-35617186;+

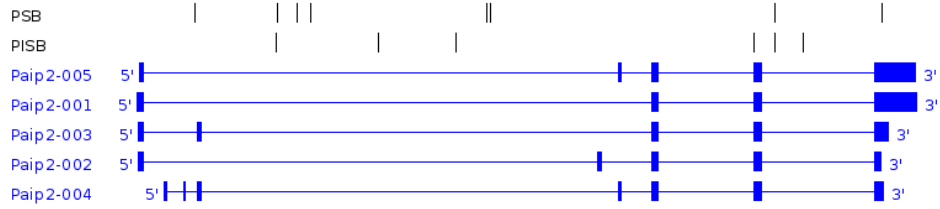

**PAK3** ChrX:143518591-143797796;+

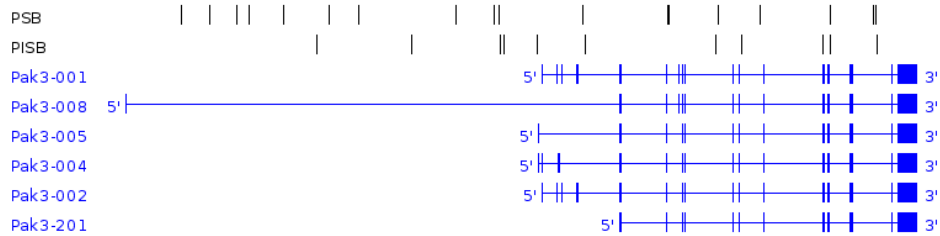

**PHIP** Chr9:82866159-82975516;-

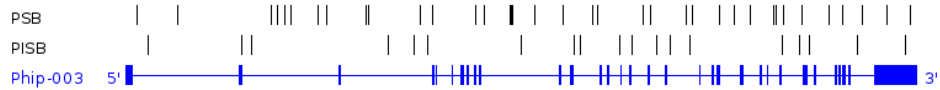

**PIAS1** Chr9:62878368-62987924;-

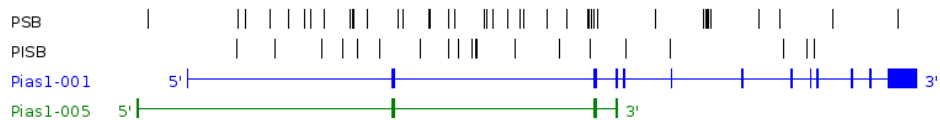

**PICALM** Chr7:90130213-90213465;+

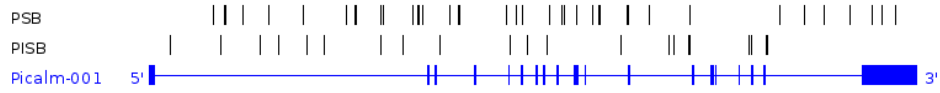

**PRL2C2** Chr13:12996132-13005383;-

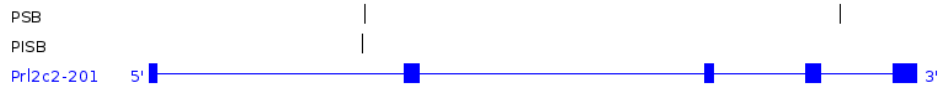

**PRL2C3** Chr13:12790822-12800078;-

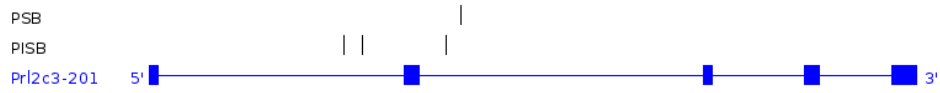

**PTBP3** Chr4:59471868-59549364;-

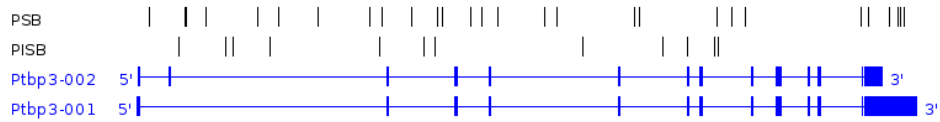

**PTPRC** Chr1:138062861-138175708;-

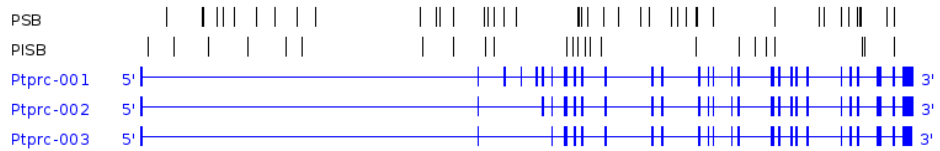

**PUM1** Chr4:130663321-130781564;+

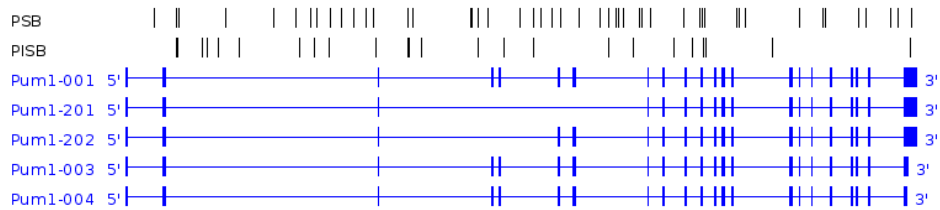

**PUM2** Chr12:8674134-8752581;+

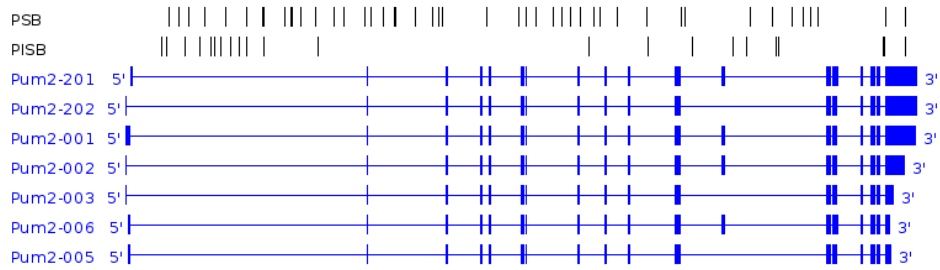

**QK** Chr17:10206471-10319361;-

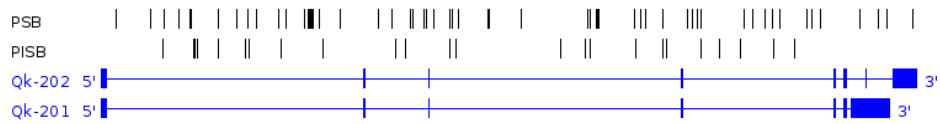

**RAB2A** Chr4:8535644-8607778;+

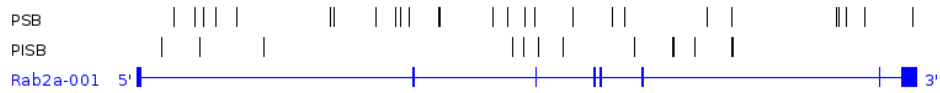

**RAB7** Chr6:87999106-88045270;-

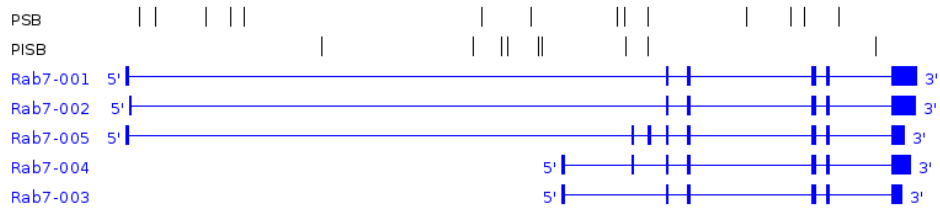

**RAD23B** Chr4:55350043-55392237;+

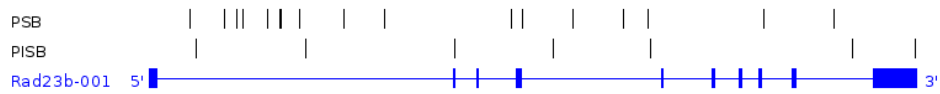

**RAP1B** Chr10:117814471-117845935;-

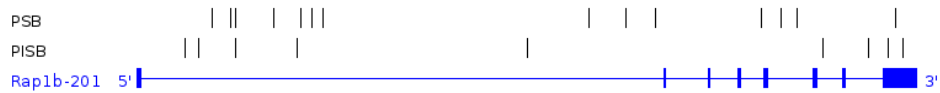

**RAPGEF2** Chr3:79062516-79286517;-

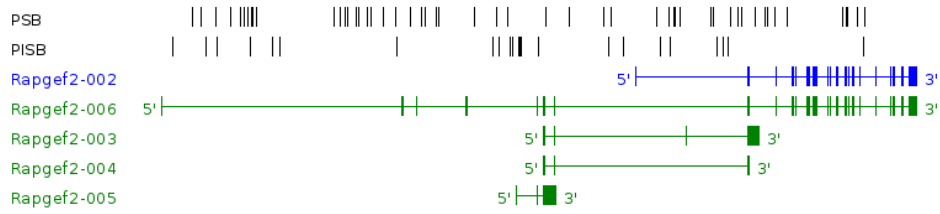

**RBM10** ChrX:20617503-20650901;+

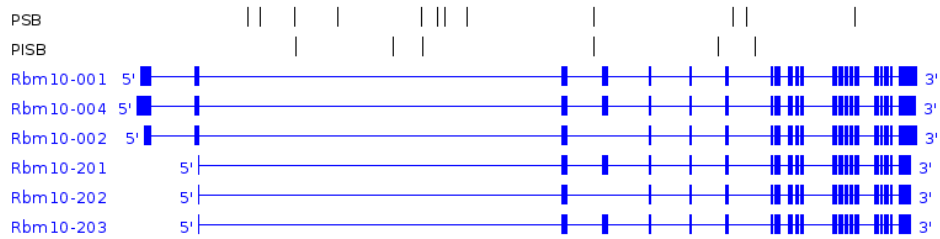

**RBM39** Chr2:156147239-156180238;-

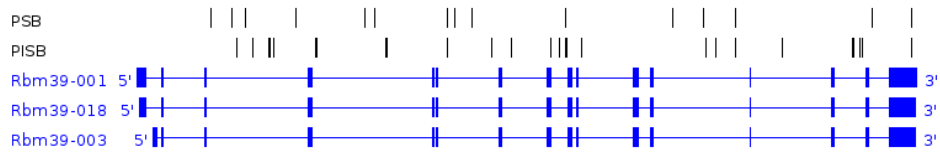

**RERE** Chr4:150281646-150621966;+

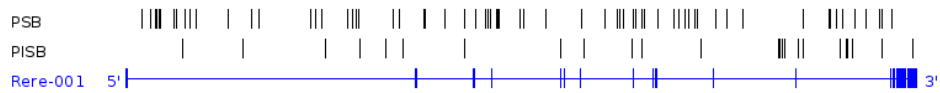

**RHOA** Chr9:108306129-108337934;+

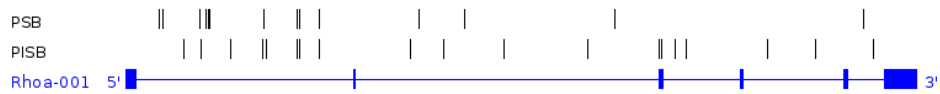

**ROCK1** Chr18:10064401-10181792;-

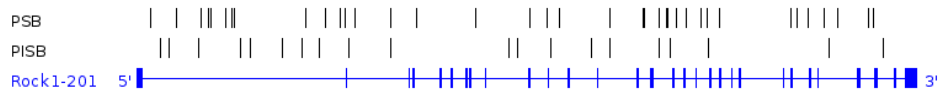

**RSF1** Chr7:97579889-97692778;+

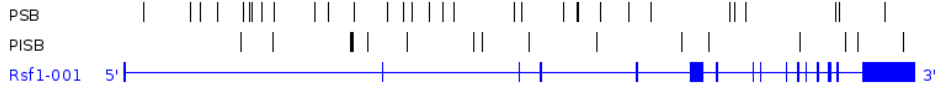

**RTN4** Chr11:29692947-29744331;+

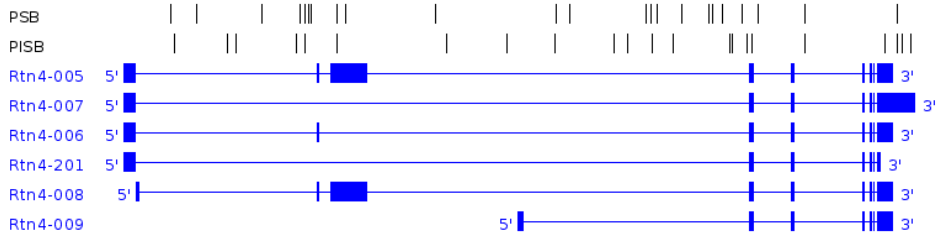

**SCAF8** Chr17:3114972-3198855;+

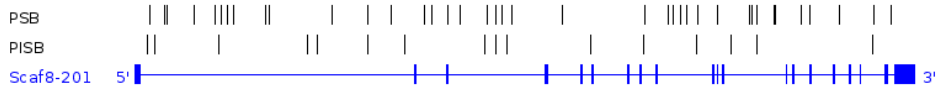

**SETD2** Chr9:110532597-110618633;+

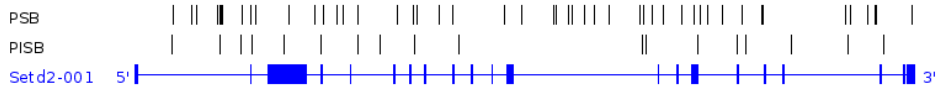

**SMG6** Chr11:74925823-75164448;+

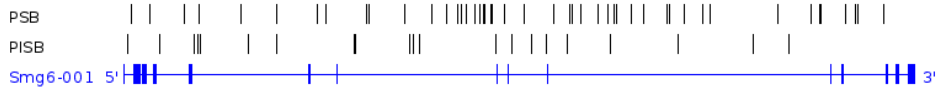

**SNRK** Chr9:122117266-122169702;+

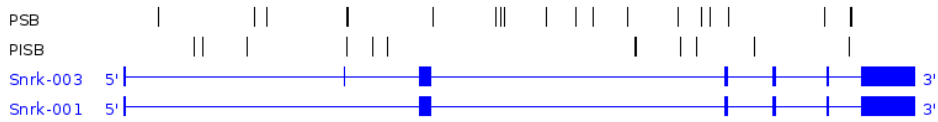

**SP3** Chr2:72936427-72980446;-

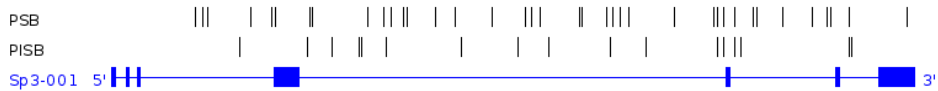



**SPPL3** Chr5:115011137-115098790;+

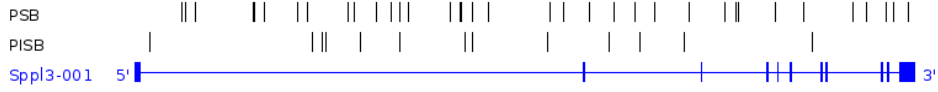

**SPRED1** Chr2:117121374-117182279;+

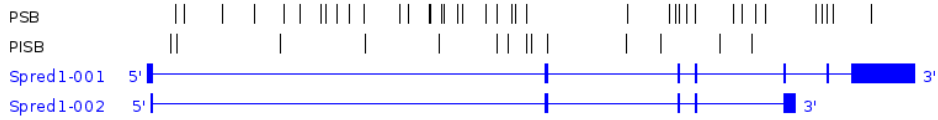

**SPTLC2** Chr12:87305058-87388355;-

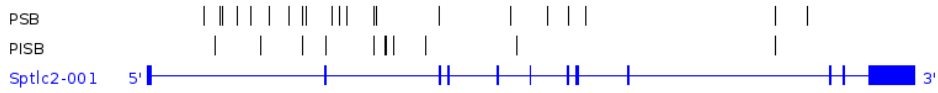

**STAG1** Chr9:100597798-100959375;+

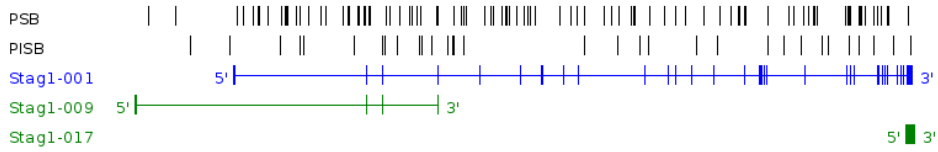

**STAG2** ChrX:42149317-42277185;+

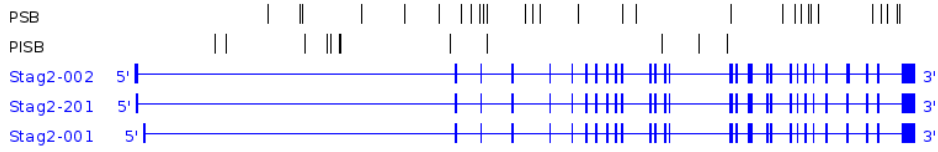

**STRN3** Chr12:51608541-51691914;-

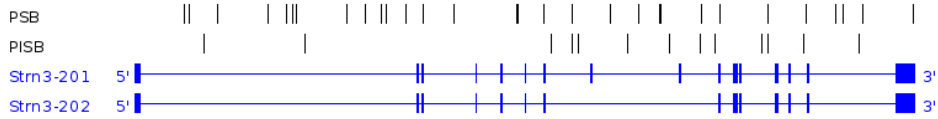

**SUSD6** Chr12:80790532-80880832;+

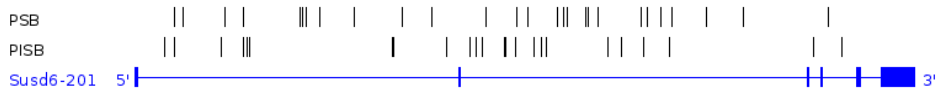

**TAOK1** Chr11:77529162-77607815;-

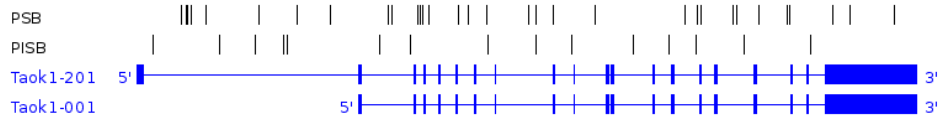

**TAX1BP1** Chr6:52713729-52766780;+

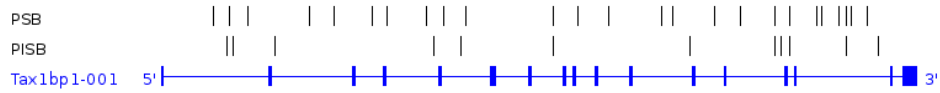

**TCF12** Chr9:71842688-72111871;-

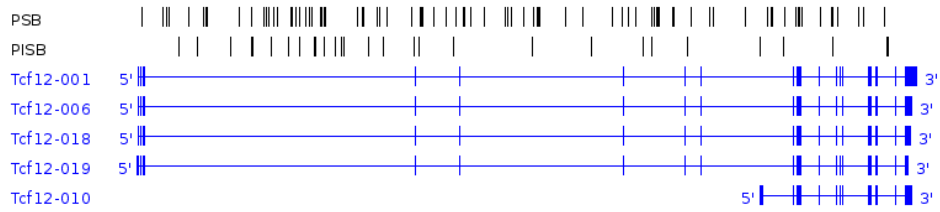

**TMEM243** Chr5:9100668-9160986;+

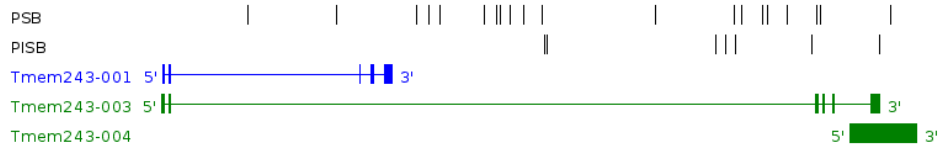

**TNRC6B** Chr15:80711319-80941086;+

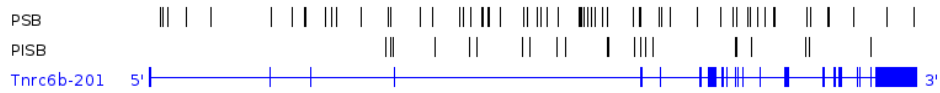

**TOP1** Chr2:160645888-160722764;+

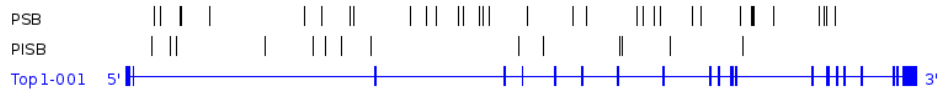

**UBAP2L** Chr3:90000140-90052628;-

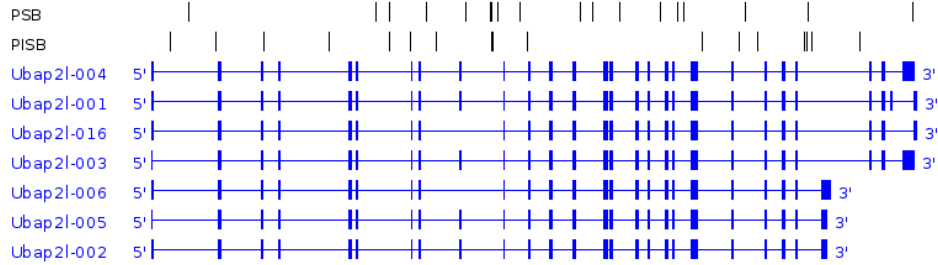

**UBE2D2A** Chr18:35771559-35807172;+

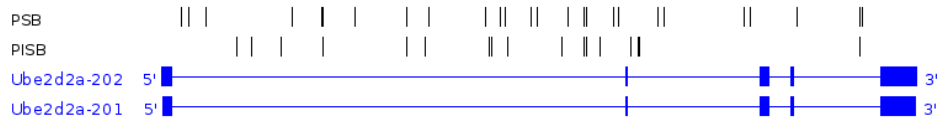

**UBE2D3** Chr3:135438149-135468198;+

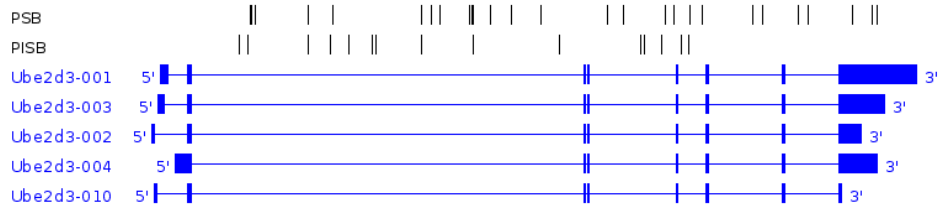

**UBE2K** Chr5:65537233-65598988;+

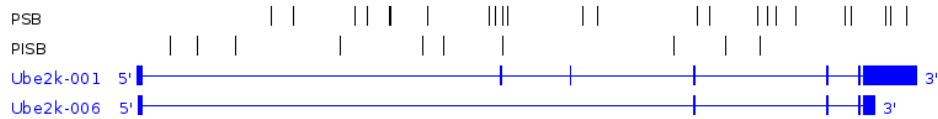

**UBE2N** Chr10:95515162-95545658;+

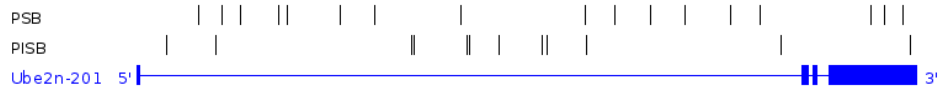

**USP34** Chr11:23306895-23490560;+

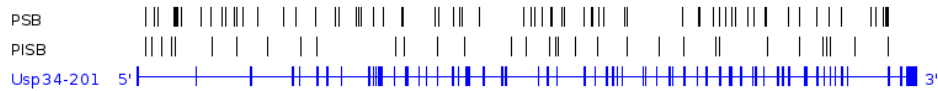

**USP9X** ChrX:13071498-13173328;+

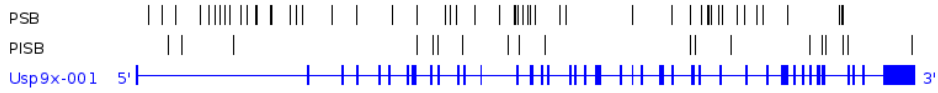

**USP9Y** ChrY:1298961-1459782;-

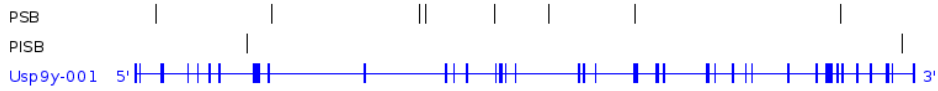

**UTY** ChrY:1096861-1245759;-

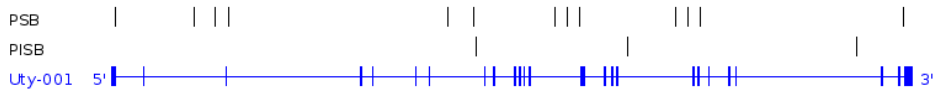

**VMN2R-PS139** ChrY:4005164-4016574;+

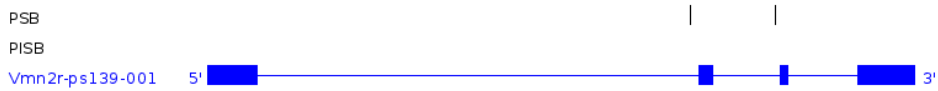

**WAC** Chr18:7868832-7973547;+

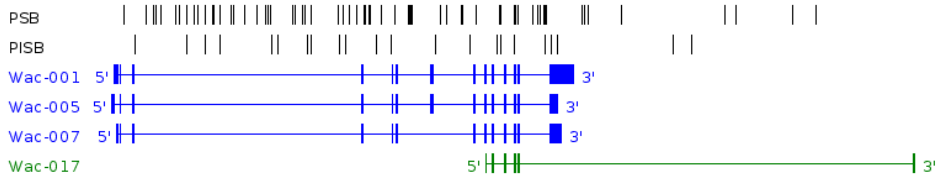

**YTHDF3** Chr3:16183212-16217037;+

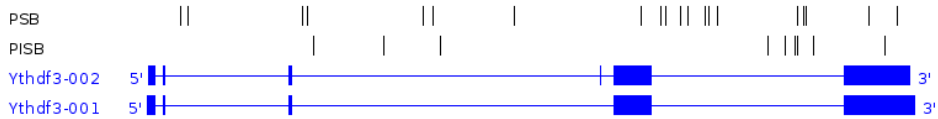

**YWHAE** Chr11:75732869-75765845;+

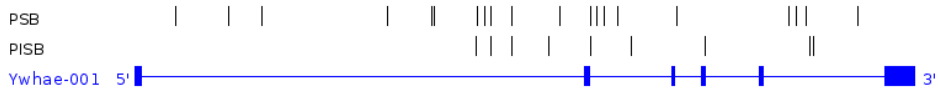

**YWHAZ** Chr15:36770770-36794547;-

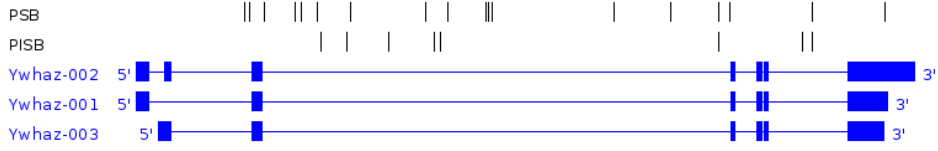

**ZBTB11** Chr16:55973883-56008913;+

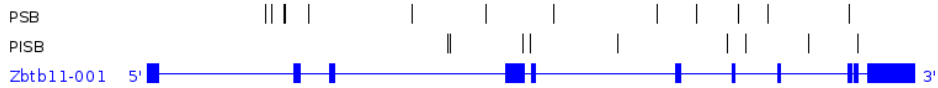

**ZFAND3** Chr17:30005087-30210019;+

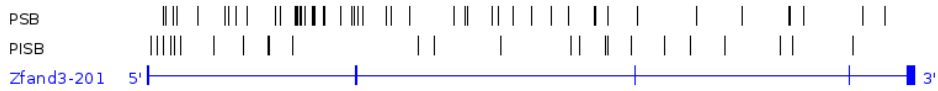

**ZFP148** Chr16:33380775-33503903;+

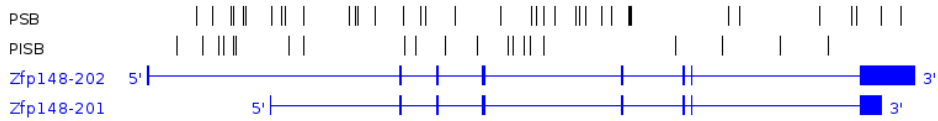

**ZFP207** Chr11:80383279-80405733;+

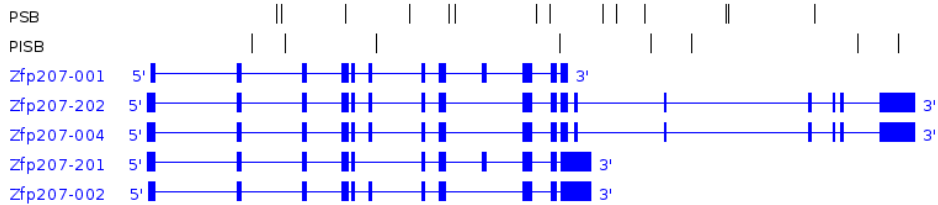

**ZFP609** Chr9:65692391-65827564;-

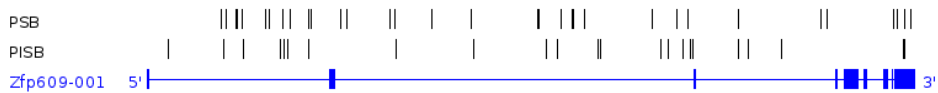

**ZMYND11** Chr13:9684836-9765321;-

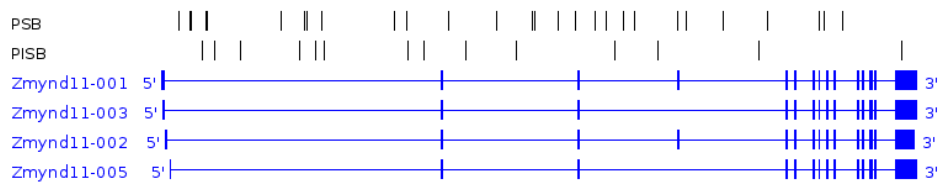

**Supplementary Figure 7.** Transposon integration pattern across the PSB∩PISB CIS genes in PSB and PISB skin tumors. Only the transposon insertions falling in the genes nearest to the center of each CIS peak are represented. For these genes, only the consensus CDS (CCDS) transcripts are shown (blue) unless these cover less than 98% of the annotated gene length, in which case non-CCDS transcripts are also depicted (green). Genes without insertions correspond to the gene closest to the center of an intergenic CIS.

**a**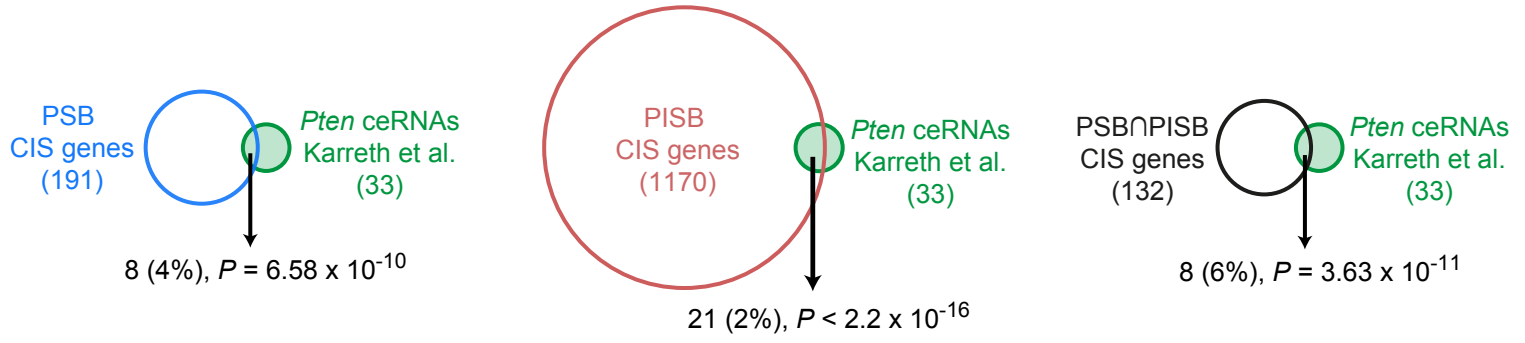**b**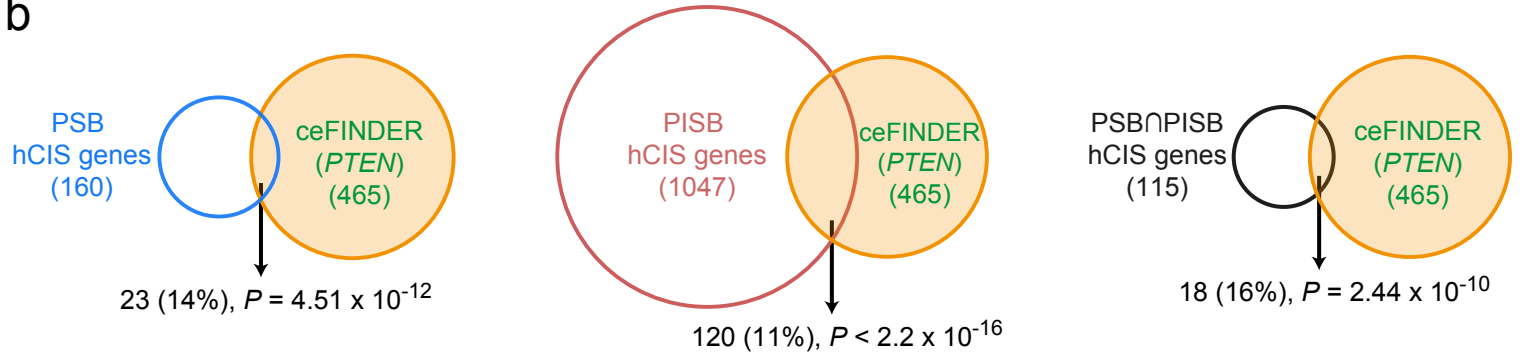



**Supplementary Figure 8.** Identification of known and putative *PTEN* competitive endogenous RNAs (ceRNAs). PSB, PISB and  $PSB \cap PISB$  CIS/hCIS genes are significantly enriched in *PTEN* ceRNAs previously reported by Karreth et al. **(a)** and predicted by the ceFINDER algorithm **(b)**. The number of genes included in each group/dataset is indicated. Mouse genes or human genes whose mouse orthologues map to chromosomes 14 and 19 were not included in the analysis. Percentages in parenthesis represent the proportion of PSB, PISB or  $PSB \cap PISB$  CIS/hCIS overlapping with each one of the two datasets. *P* values were calculated using a two-by-two contingency table and Fisher's exact test.

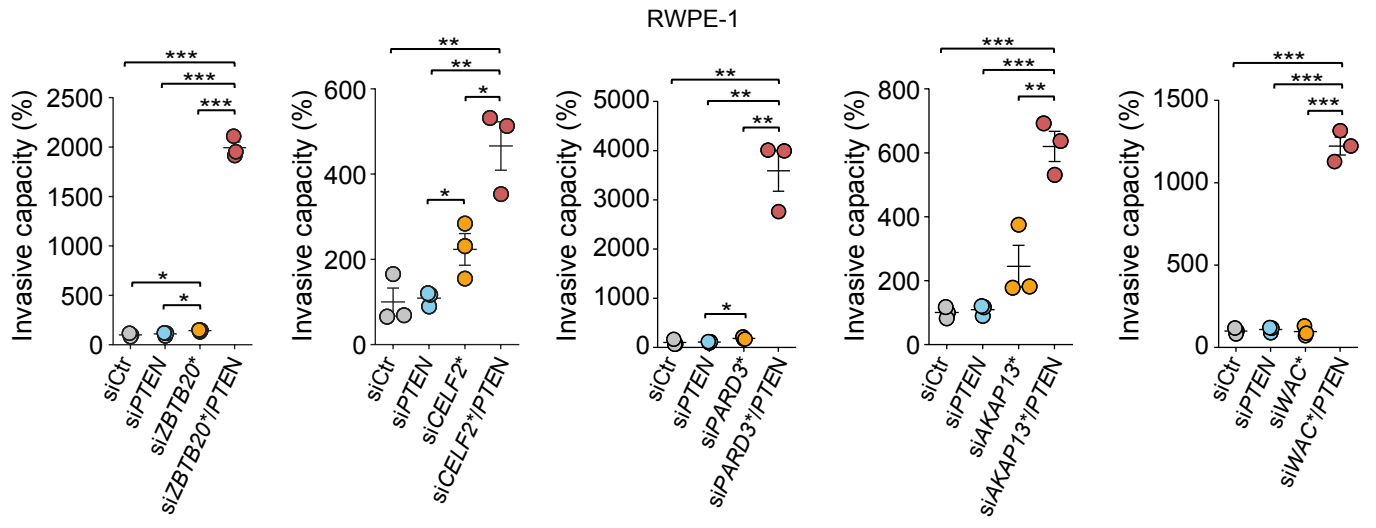

Supplementary Figure 9

**Supplementary Figure 9.** Effect of *ZBTB20*, *CELF2*, *PARD3*, *AKAP13* and *WAC* silencing, either alone or in combination with *PTEN* interfering, on the invasiveness of the RWPE-1 immortalized human prostate cell line. Alternative siRNAs to those of Figure 4 were used. Cell invasion rate is expressed as a percentage relative to the mean of control invasion rate values, which was set as 100%. Each circle represents an individual technical replicate. Horizontal lines represent the means and error bars correspond to s.e.m in each condition. \* $P < 0.05$ , \*\* $P < 0.01$ , \*\*\* $P < 0.001$ , two-tailed Student's t test.

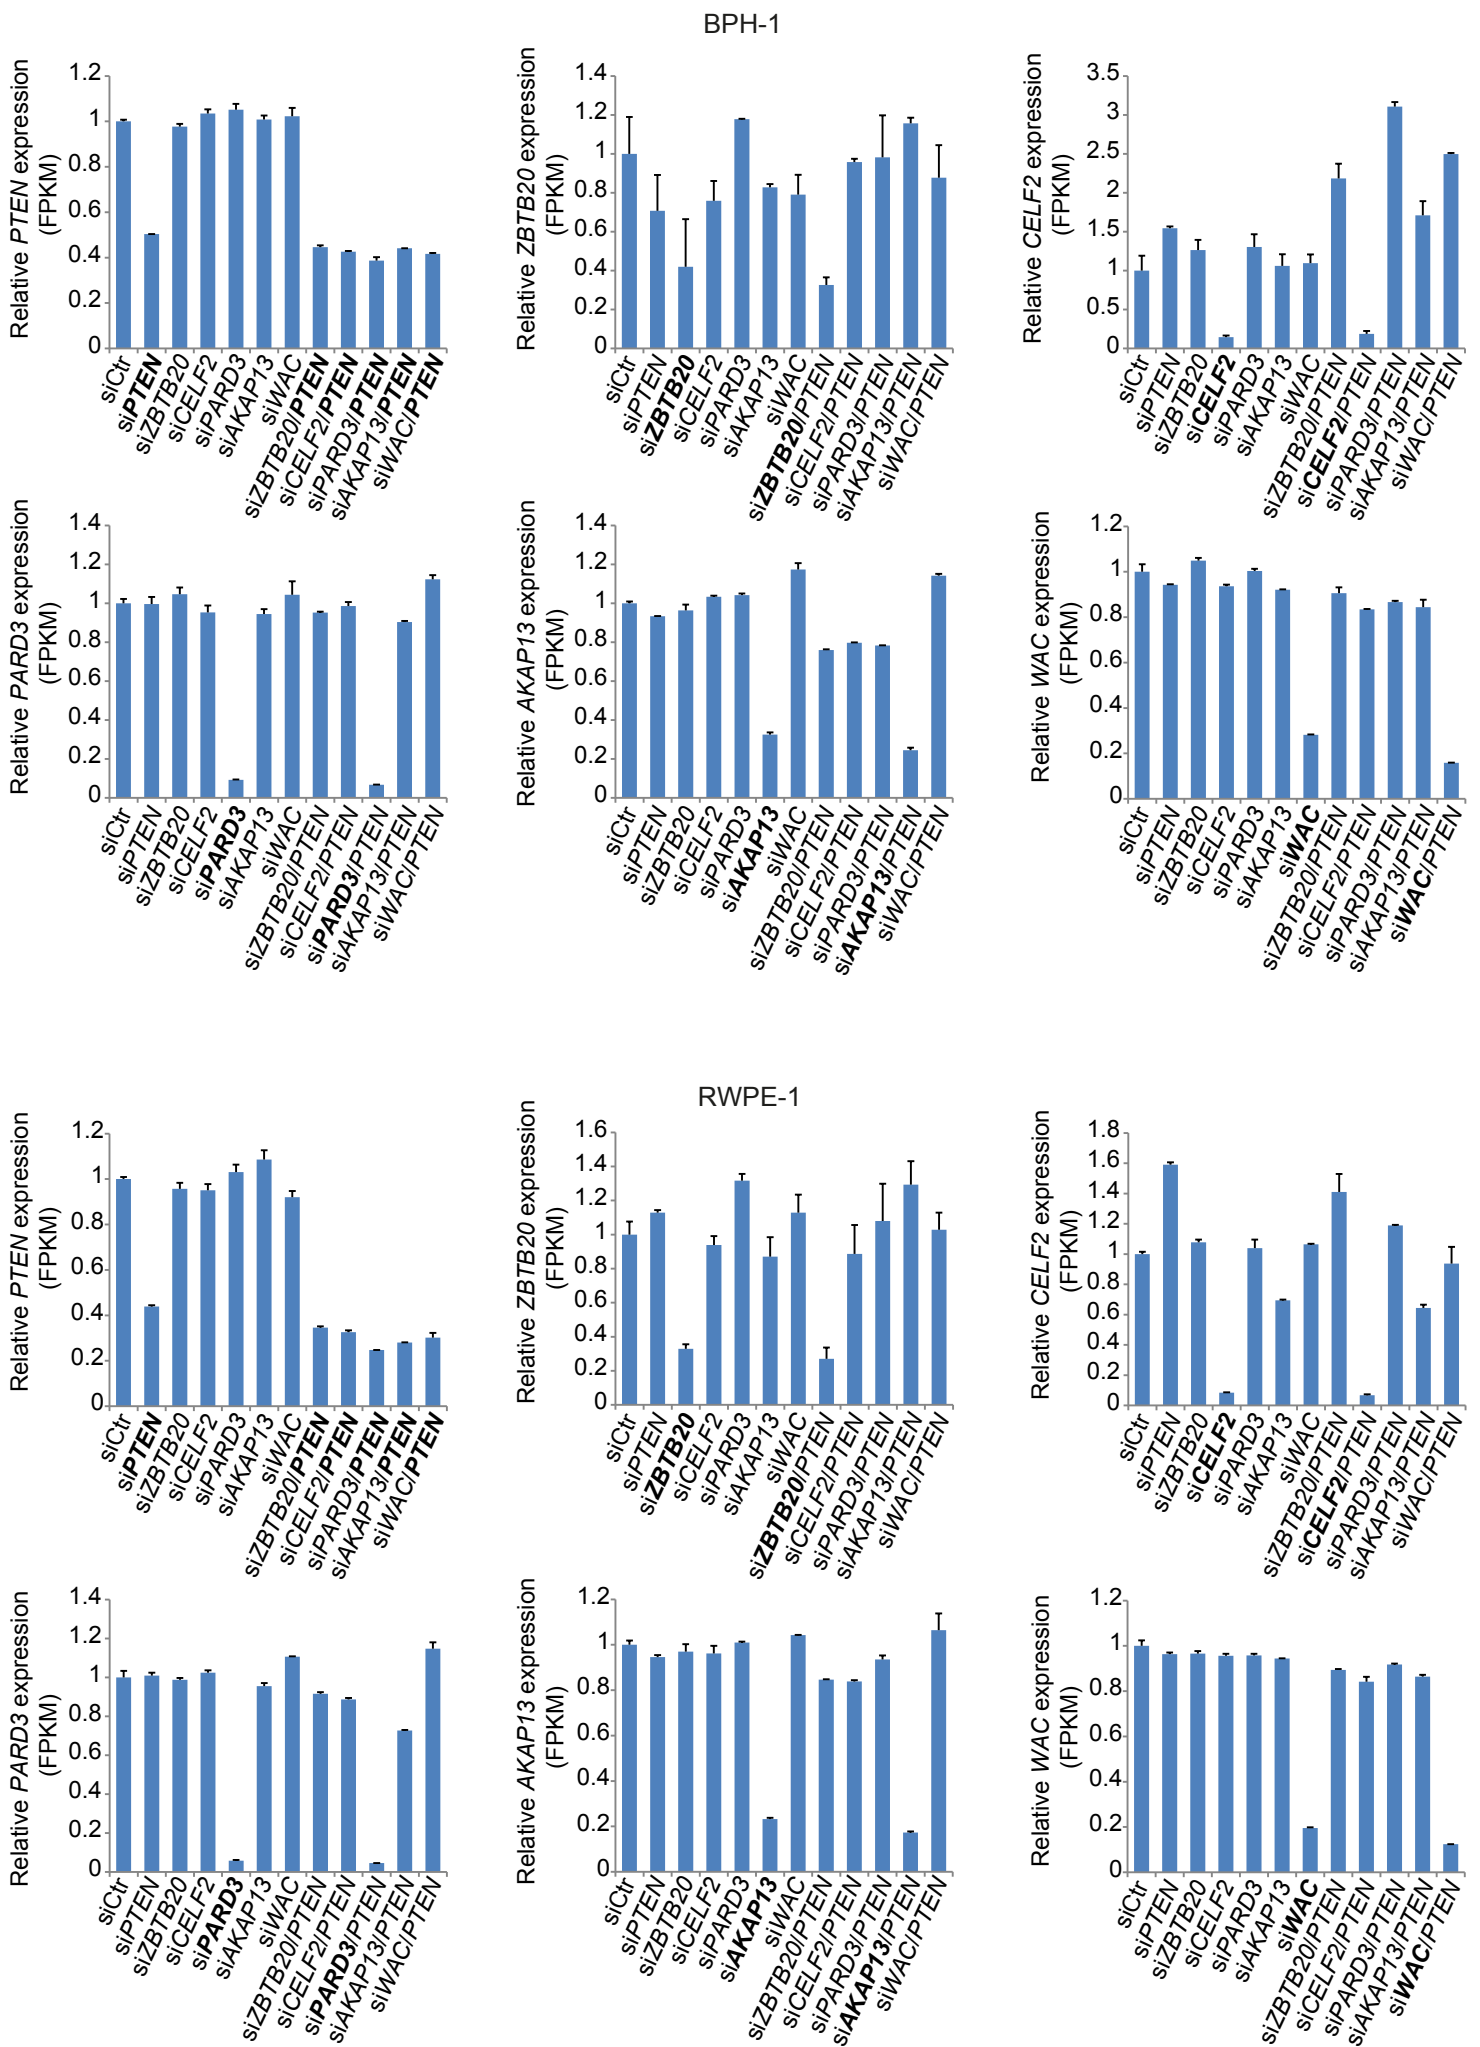

**Supplementary Figure 10.** Relative mRNA expression of *PTEN*, *ZBTB20*, *CELF2*, *PARD3*, *AKAP13* and *WAC* in all co-silencing and single-silencing conditions in BPH-1 and RWPE-1 cell lines. FPKM values were used.

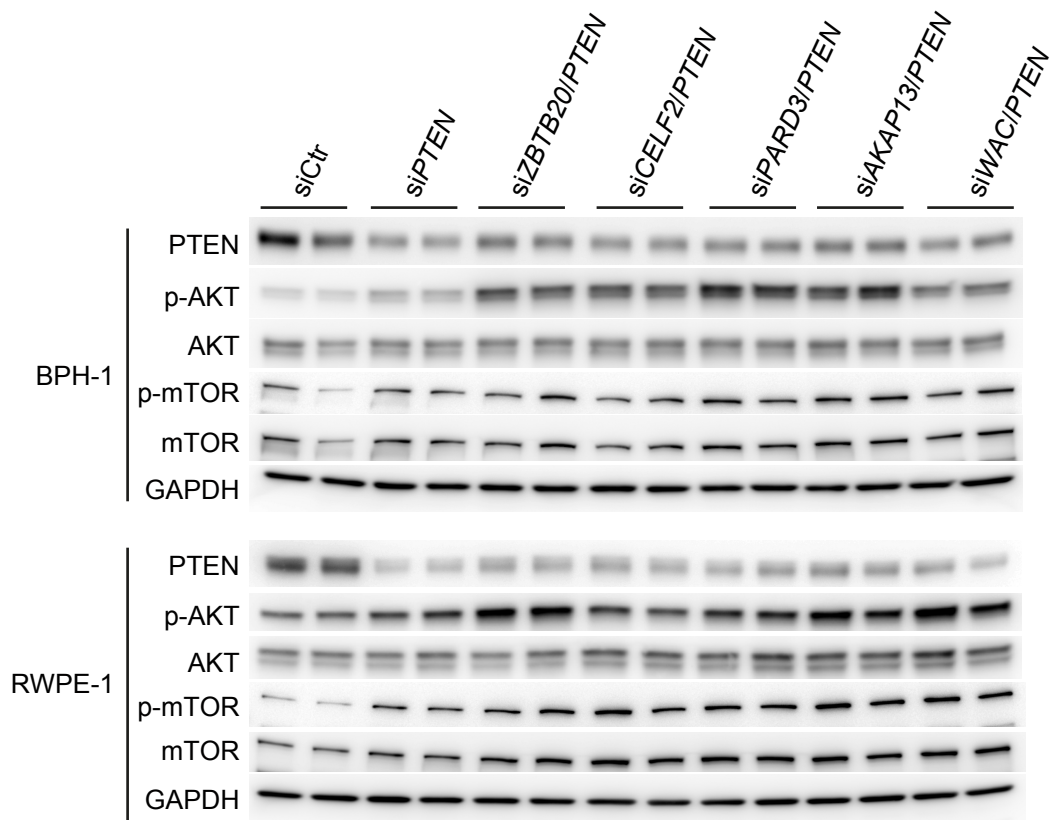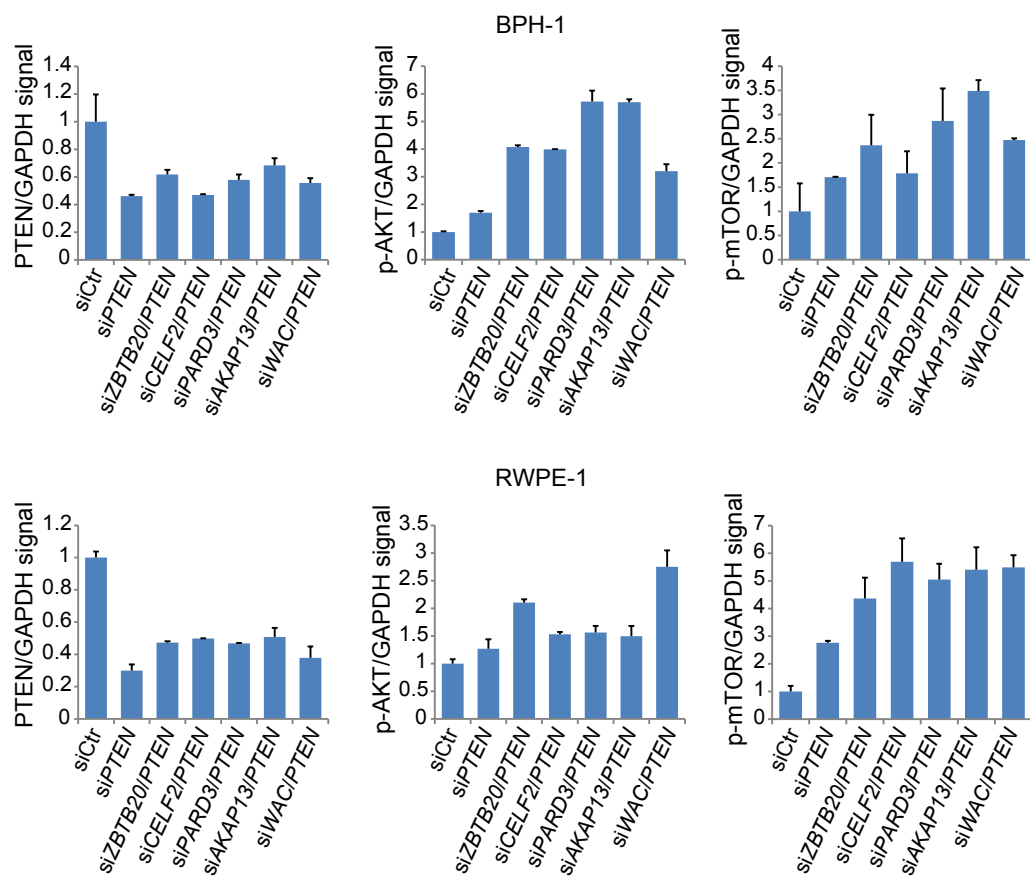

**Supplementary Figure 11.** Western blot analysis of the PI3K/AKT/mTOR signaling pathway in BPH-1 and RWPE-1 cells upon co-silencing of *ZBTB20*, *CELF2*, *PARD3*, *AKAP13* and *WAC* with *PTEN*. Upper panel: Western blot analysis of PTEN, p-AKT, AKT, p-mTOR, mTOR and GAPDH is shown for each of the conditions examined. Lower panel: densitometry analysis of the immunoblots. GAPDH was used for protein level normalization.

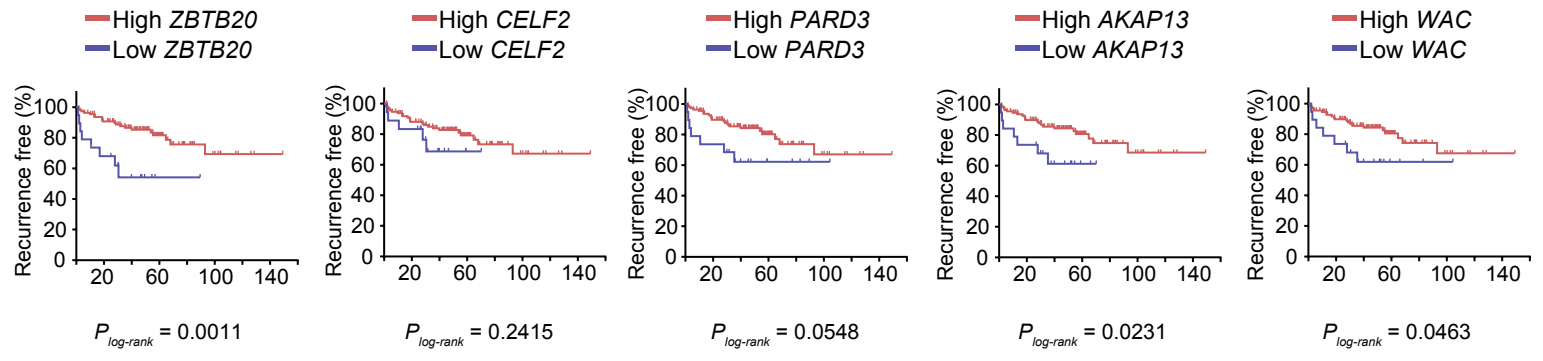



**Supplementary Figure 12.** Recurrence-free survival Kaplan-Meier analysis of the 15% of patients with lowest mRNA expression levels of each of the five genes selected for validation versus the remaining 85%. Only patients with primary tumors were taken into account. Analyses were performed using the Taylor dataset and the open web interface 'Project Betastasis' (<http://www.betastasis.com>). P values were obtained by log-rank test.

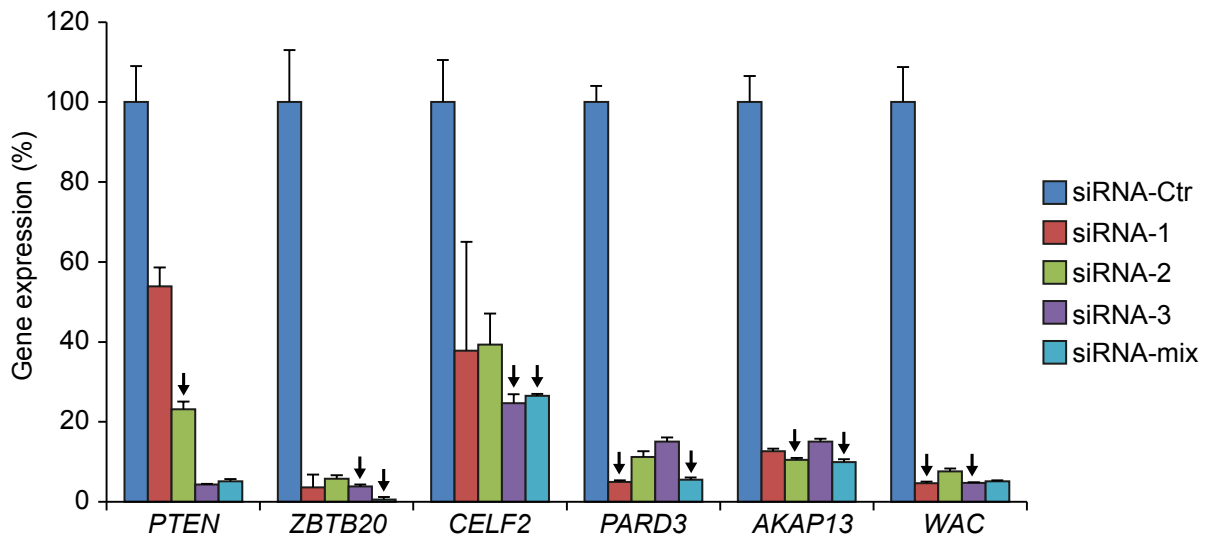

**Supplementary Figure 13.** Knockdown efficiency of *PTEN*, *ZBTB20*, *CELF2*, *PARD3*, *AKAP13* and *WAC* silencing in BPH-1 cells. Three different siRNAs or a combination of the three were tested per each gene. Gene silencing efficiency was evaluated by quantitative PCR (qPCR) and represented as a percentage relative to control siRNA-transfected cells, which was set as 100%. Arrows indicate those conditions selected for each gene for subsequent studies. Results are expressed as mean  $\pm$  s.d.
